# Supplementary material for: Modeling Initiation of Ewing Sarcoma in Human Neural Crest Cells
Source: PLoS One. 2011 Apr 29;6(4):e19305. doi: 10.1371/journal.pone.0019305 (PMC3084816; doi:10.1371/journal.pone.0019305)
Supplement: Table S1 — A. Significant EWS-FLI1 modulated transcripts. B. Overlapping EWS-FLI1 target genes in published datasets. (XLSX) [file pone.0019305.s001.xlsx]

## Sheet: Table S1A
Transcript ID	Gene Symbol	RefSeq	p-value	Median Fold change (log2)	Median Fold change (absolute)
2705748	AADACL1	NM_020792	0.00223718	-0.74799	-1.67945
3768969	ABCA5	NM_018672	0.000293555	1.20554	2.30624
3768791	ABCA6	NM_080284	0.00163873	0.91131	1.88075
3060117	ABCB4	NM_000443	0.01275	-0.76341	-1.6975
3521174	ABCC4	NM_005845	0.00180771	0.65622	1.57595
3446919	ABCC9	NM_020297	0.000645336	1.06236	2.08834
2777276	ABCG2	NM_004827	0.00492606	-1.29725	-2.4576
3430959	ACACB	NM_001093	1.25402e-05	1.277	2.42335
2642720	ACPP	NM_001099	0.0178999	-0.6241	-1.54125
2796553	ACSL1	NM_001995	0.0172665	-0.74769	-1.6791
3299504	ACTA2	NM_001613	0.0199159	0.5941	1.50953
3617719	ACTC1	NM_005159	0.0151471	-0.727	-1.65519
2489007	ACTG2	NM_001615	0.0121621	-0.90915	-1.87794
2386943	ACTN2	NM_001103	6.62633e-07	2.01705	4.04755
3428088	ACTR6	NM_022496	2.61616e-05	0.65665	1.57642
3927446	ADAMTS1	NM_006988	0.00834648	-0.70686	-1.63225
2772876	ADAMTS3	NM_014243	0.00190619	-1.02623	-2.0367
3163982	ADAMTSL1	NM_001040272	0.000928276	-0.82333	-1.76949
2692319	ADCY5	NM_183357	0.00609063	0.7941	1.734
3940099	ADORA2A	NM_000675	0.00245371	-0.72726	-1.65549
3895891	ADRA1D	NM_000678	0.00216603	2.2756	4.84199
4049835	ADRB3	NM_000025	1.24818e-06	1.92449	3.79603
3307851	AFAP1L2	NM_001001936	0.00223259	-0.58941	-1.50463
2566848	AFF3	NM_001025108	0.0143348	-0.74913	-1.68078
3197318	AK3	NM_016282	0.000493489	0.8502	1.80275
2925724	AKAP7	NM_016377	0.00840946	0.88965	1.85273
2634494	ALCAM	NM_001627	0.0174828	0.608	1.52414
2339682	ALG6	NM_013339	0.0103915	0.77409	1.71011
2546409	ALK	NM_004304	0.00908264	0.88281	1.84396
2324416	ALPL	NM_000478	0.00557119	0.70746	1.63293
2849469	ANKH	NM_054027	0.00251593	1.24776	2.37472
2442980	ANKRD26L1	BC007072	0.00138633	-0.86575	-1.82229
2916825	ANKRD6	NM_014942	0.0115543	-0.67613	-1.59785
2997376	ANLN	NM_018685	0.0037647	-0.58838	-1.50356
2428855	AP4B1	NM_006594	0.0024564	1.09438	2.13521
4021250	APLN	NM_017413	0.000330349	0.7774	1.71404
2677723	ARHGEF3	NM_001128615	0.00217856	-0.6556	-1.57527
4023467	ARHGEF6	NM_004840	2.76501e-05	2.53371	5.79059
3078948	ARP11	AB039791	0.0118141	0.84929	1.80161
3382216	ARRB1	NM_004041	6.48864e-07	0.80135	1.74273
2782694	ARSJ	NM_024590	1.10232e-05	-0.95995	-1.94524
3261923	AS3MT	NM_020682	0.00332354	0.67718	1.59901
3395464	ASAM	NM_024769	0.0130944	1.04492	2.06325
2449559	ASPM	NM_018136	0.0203059	-0.71485	-1.64131
3456306	ATF7	NM_001130059	0.00497347	0.63925	1.55752
2532793	ATG16L1	NM_030803	0.00337104	1.00157	2.00218
2726072	ATP10D	NM_020453	0.00448589	-0.94537	-1.92568
4024160	ATP11C	NM_173694	0.00424544	0.65331	1.57277
2353477	ATP1A1	NM_000701	0.00442689	0.8407	1.79092
3863342	ATP1A3	NM_152296	0.000347664	1.9703	3.9185
2375706	ATP2B4	NM_001001396	4.75446e-08	-0.6158	-1.53241
3982423	ATP7A	NM_000052	0.0114109	0.65872	1.57868
3809826	ATP8B1	NM_005603	1.99234e-07	2.83141	7.11769
2449104	B3GALT2	NM_003783	0.015403	-1.03519	-2.04938
2911372	BAG2	NM_004282	0.000205446	-0.91073	-1.88
3737874	BAHCC1	NM_001080519	0.000433764	0.92174	1.8944
2634965	BBX	NM_020235	0.0177117	-0.64442	-1.56311
2423422	BCAR3	NM_003567	0.00498668	-0.71931	-1.64639
3579114	BCL11B	NM_138576	0.00639602	0.61805	1.5348
3811339	BCL2	NM_000633	0.00150209	0.78212	1.71966
3708223	BCL6B	NM_181844	0.00238627	0.59105	1.50634
3550307	BDKRB1	NM_000710	0.00511233	-1.17137	-2.25225
3550278	BDKRB2	NM_000623	0.0094127	-0.66365	-1.58409
2814527	BDP1	NM_018429	0.00166038	0.82358	1.76979
3995633	BGN	NM_001711	3.40338e-05	1.42231	2.68014
2608725	BHLHE40	NM_003670	0.0120017	-0.94089	-1.91971
2958172	BMP5	NM_021073	0.00616526	-1.50447	-2.8372
2636319	BOC	NM_033254	0.000892657	-0.66866	-1.5896
3765580	BRIP1	NM_032043	0.0121076	-0.74968	-1.68142
2899340	BTN2A2	NM_006995	0.0172939	-0.65256	-1.57196
2899372	BTN3A1	NM_007048	0.00123134	-0.61822	-1.53498
2570616	BUB1	NM_004336	0.00173886	-0.80319	-1.74496
3327166	C11orf74	AK302634	0.00522372	0.96646	1.95404
3428845	C12orf48	AK302724	0.000631506	0.74837	1.67989
3472000	C12orf51	NM_001109662	0.000101012	0.74818	1.67967
3486956	C13orf15	NM_014059	0.00994391	-0.63685	-1.55493
3512948	C13orf18	NM_025113	0.000562723	3.11317	8.65282
3602569	C15orf27	NM_152335	3.48165e-05	0.72105	1.64838
3614012	C15orf49	BC069077	0.00984317	-0.70479	-1.62991
3807474	C18orf32	BC093004	0.000375398	0.69849	1.62281
2353396	C1orf161	BC128148	0.0120679	0.64445	1.56314
2460325	C1orf198	NM_001136494	0.000712535	-0.69977	-1.62425
2852766	C1QTNF3	NM_181435	0.00807146	0.69665	1.62074
3929291	C21orf59	AF282851	0.00129728	0.70029	1.62483
3918104	C21orf63	NM_058187	0.000180504	0.93935	1.91766
3848039	C3	NM_000064	0.000739723	-1.1434	-2.20901
2636062	C3orf52	NM_024616	0.000332233	-0.66244	-1.58276
2711034	C3orf59	NM_178496	0.00262478	-0.61701	-1.53369
2793310	C4orf27	NM_017867	0.00898357	0.77263	1.70838
2743029	C4orf29	NM_001039717	0.00370797	-0.76353	-1.69764
2786567	C4orf49	NM_032623	0.0204314	-0.80879	-1.75174
2805695	C5orf23	BC022250	0.0165528	2.16485	4.4842
2880463	C5orf46	NM_206966	0.00460357	-0.88134	-1.84209
2909772	C6orf141	BC036917	0.00310002	1.05435	2.07678
2974671	C6orf192	NM_052831	0.0040018	0.65387	1.57338
3019565	C7orf53	NM_182597	0.00294241	-0.63645	-1.5545
3021158	C7orf58	NM_024913	0.0118126	-2.07885	-4.2247
3086774	C8orf79	NM_020844	0.0139552	1.1942	2.28818
3086809	C8orf79	NM_001099677	0.0124416	1.18317	2.27075
3197231	C9orf68	NM_001039395	0.000155308	1.05924	2.08383
3160500	C9orf70	BC007366	0.0118427	-0.60831	-1.52447
3105581	CA3	NM_005181	0.00243252	-0.6731	-1.5945
3137120	CA8	NM_004056	4.26709e-05	0.80927	1.75232
3513752	CAB39L	NM_030925	0.0173672	1.21387	2.31959
3781531	CABLES1	NM_001100619	6.96311e-05	0.98111	1.97398
2340078	CACHD1	NM_020925	0.000561384	0.91178	1.88137
3392332	CADM1	NM_014333	0.0126422	-0.86102	-1.81632
3070309	CADPS2	NM_017954	0.000447321	3.37064	10.3434
3667508	CALB2	NM_001740	0.00472664	-0.96696	-1.95472
3061538	CALCR	NM_001742	0.00500382	-1.23165	-2.34835
3548346	CALM1	NM_006888	0.00633061	0.97046	1.95947
2378019	CAMK1G	NM_020439	0.003067	1.19275	2.28588
4018194	CAPN6	NM_014289	0.000126983	2.27261	4.83196
3866958	CARD8	NM_014959	0.000291394	0.72745	1.65571
2522728	CASP8	NM_001228	0.000303493	-0.64806	-1.56706
3023103	CCDC136	NM_022742	0.00782921	-0.59272	-1.50809
3748449	CCDC144A	NM_014695	0.00057483	-0.58998	-1.50523
3838444	CCDC155	NM_144688	0.0131512	0.5851	1.50014
2688813	CCDC80	NM_199511	0.000246177	-1.31652	-2.49065
2855542	CCL28	NM_148672	0.0148907	-0.73779	-1.66762
2784113	CCNA2	NM_001237	0.00698822	-0.70035	-1.6249
3555300	CCNB1IP1	NM_021178	8.87599e-09	0.70557	1.63079
3338192	CCND1	NM_053056	0.00328562	0.5981	1.51372
4035833	CD24	NM_013230	0.000542679	0.97796	1.96968
2453307	CD34	NM_001773	0.000661116	0.79732	1.73787
3402786	CD4	NM_000616	0.0018608	0.6283	1.54574
2895841	CD83	NM_004233	0.00115547	0.6864	1.60926
2333136	CDC20	NM_001255	0.00483415	-0.72877	-1.65723
3160735	CDC37L1	NM_017913	0.0214547	0.60108	1.51685
2459042	CDC42BPA	NM_003607	0.000433609	0.61132	1.52766
2548617	CDC42EP3	NM_006449	0.0205702	-0.85396	-1.80746
3090697	CDCA2	NM_152562	0.0121467	-0.61327	-1.52972
3040897	CDCA7L	NM_001127370	2.13623e-05	-0.80965	-1.75279
2851274	CDH10	NM_006727	0.00388541	-0.88305	-1.84427
2850964	CDH12	NM_004061	0.0126377	2.60157	6.06947
2805078	CDH6	NM_004932	0.0204522	-2.0789	-4.22485
3694215	CDH8	NM_001796	8.61398e-07	2.35175	5.10443
3061319	CDK6	NM_001259	0.0032154	-0.60922	-1.52543
3536336	CDKN3	NM_005192	0.00174045	-0.69975	-1.62422
2734270	CDS1	NM_001263	0.00680856	0.71325	1.63949
3863669	CEACAM1	NM_001712	0.0137307	0.72257	1.65012
2697490	CEP70	NM_024491	0.00444601	-0.58559	-1.50065
3199500	CER1	NM_005454	9.58773e-05	2.11153	4.32149
3166844	CHMP5	NM_016410	0.0158141	0.68813	1.61119
3386217	CHORDC1	NM_012124	0.00102383	2.09035	4.25851
3026216	CHRM2	NM_001006626	0.00159809	0.81713	1.7619
2344984	CLCA2	NM_006536	0.00202981	2.01296	4.03609
2710599	CLDN1	NM_021101	0.000827778	2.5832	5.99267
2657808	CLDN16	NM_006580	0.00907603	0.59683	1.51239
3443985	CLEC1A	NM_016511	0.016098	0.73753	1.66732
3404436	CLEC2D	NM_001004419	0.000182297	0.6276	1.54499
7385641	CLSTN2	NM_022131	0.000584429	-1.21381	-2.31949
2382467	CNIH3	NM_152495	0.00634403	-0.66314	-1.58353
2980516	CNKSR3	NM_173515	0.0126133	-0.61065	-1.52695
2963859	CNR1	NM_016083	0.00239423	-1.05847	-2.08272
3411721	CNTN1	NM_001843	0.00580607	0.64642	1.56528
3345940	CNTN5	NM_014361	0.000388365	0.63246	1.55021
3181642	COL15A1	NM_001855	0.000163718	0.93522	1.91218
2958232	COL21A1	NM_030820	0.000147861	2.67621	6.39175
2519577	COL3A1	NM_000090	0.00711599	-0.769	-1.70409
3238466	COMMD3	NM_012071	0.00343775	0.67435	1.59588
3023883	CPA4	NM_016352	0.00270691	-2.64374	-6.2495
2750627	CPE	NM_001873	0.00247808	-1.20889	-2.3116
2719361	CPEB2	NM_182485	1.37174e-05	0.99589	1.99431
2438458	CRABP2	NM_001878	0.00237934	-1.79685	-3.47461
3075136	CREB3L2	NM_194071	0.00219386	-0.66044	-1.58056
3855104	CRLF1	NM_004750	0.00474331	1.08645	2.12351
2672821	CSPG5	NM_006574	0.00341821	1.25593	2.38821
3069470	CTTNBP2	NM_033427	0.000398404	1.30552	2.47173
3387171	CWC15	NM_016403	0.00262529	0.77549	1.71177
2773434	CXCL2	NM_002089	0.00740277	-0.94033	-1.91897
2731350	CXCL6	NM_002993	0.0140356	-1.92032	-3.78507
2578028	CXCR4	NM_001008540	0.0162839	-0.66255	-1.58288
4002011	CXorf23	NM_198279	0.0077313	0.87922	1.83938
2548699	CYP1B1	NM_000104	0.00286178	-0.79702	-1.73751
2528093	CYP27A1	NM_000784	0.000654694	-0.61696	-1.53364
3364119	CYP2R1	BC052580	0.0210969	0.66279	1.58314
3138204	CYP7B1	NM_004820	0.00298428	1.21748	2.3254
3927392	CYYR1	NM_052954	0.00399293	1.28581	2.43819
3177880	DAPK1	NM_004938	0.00384831	2.62256	6.15842
3628832	DAPK2	NM_014326	0.0125407	1.44325	2.71933
3223157	DBC1	NM_014618	0.00651434	1.27854	2.42593
2922972	DCBLD1	NM_173674	0.00204396	-0.58707	-1.50219
3788560	DCC	NM_005215	7.12115e-06	2.7502	6.7281
2352743	DCLRE1B	NM_022836	0.00120306	0.58829	1.50346
3687789	DCTPP1	NM_024096	0.00362143	0.68213	1.60451
4018218	DCX	NM_000555	0.0185196	1.38003	2.60274
2449693	DENND1B	BC074735	0.00036231	-0.78885	-1.7277
2429147	DENND2C	NM_198459	0.000418978	0.97655	1.96775
2417528	DEPDC1	NM_001114120	0.00337797	-0.91543	-1.88613
2532894	DGKD	NM_152879	0.000154003	2.33072	5.03056
3573870	DIO2	NM_013989	4.33504e-05	-1.10197	-2.14648
3552684	DIO3	NM_001362	0.0058782	1.54545	2.91895
2731636	DKFZP564O0823	NM_015393	5.97959e-07	-0.89135	-1.85491
3125116	DLC1	NM_182643	1.14658e-06	0.81829	1.76331
3384704	DLG2	NM_001364	0.00210258	1.94044	3.83823
3384718	DLG2	NM_001364	0.000919469	0.81576	1.76023
3062523	DLX5	NM_005221	3.66723e-06	-0.81749	-1.76234
3772437	DNAH17	AK097776	0.00834617	0.61974	1.5366
3690084	DNAJA2	NM_005880	0.00290941	0.66088	1.58105
3292413	DNAJC12	NM_021800	0.000979596	2.4005	5.27986
2340350	DNAJC6	NM_014787	0.00115377	-0.74601	-1.67715
3571059	DPF3	NM_012074	5.14368e-08	1.16599	2.24387
2584018	DPP4	NM_001935	0.00374029	1.41266	2.66228
2424524	DPYD	NM_000110	0.00453157	-0.74703	-1.67833
2880292	DPYSL3	NM_001387	0.000711443	-0.87966	-1.83994
3391653	DRD2	NM_000795	0.0142395	0.68854	1.61165
3812074	DSEL	NM_032160	9.1438e-06	1.00589	2.00818
2638962	DTX3L	NM_138287	0.0214594	-0.77817	-1.71495
2457261	DUSP10	NM_007207	0.00257049	-1.01695	-2.02364
3464860	DUSP6	NM_001946	0.0027852	1.3669	2.57916
2675925	DUSP7	NM_001947	0.00355053	0.71229	1.6384
3434393	DYNLL1	NM_001037494	1.69463e-06	0.6456	1.56439
2746591	EDNRA	NM_001957	0.00559174	2.03762	4.10568
3518766	EDNRB	NM_001122659	0.00587694	-1.09684	-2.13886
2554018	EFEMP1	NM_004105	0.000859029	-1.1363	-2.19817
3980170	EFNB1	NM_004429	0.00157304	0.65762	1.57748
3291601	EGR2	NM_000399	0.00738705	1.07027	2.09983
2484970	EHBP1	NM_015252	0.00234114	-0.63284	-1.55061
3148582	EIF3E	NM_001568	4.23615e-06	0.59741	1.513
2867873	ELL2	NM_012081	0.00144536	-1.01157	-2.0161
3008019	ELN	NM_000501	0.0132363	0.71927	1.64635
2941721	ELOVL2	NM_017770	0.00179996	-1.03988	-2.05606
2419432	ELTD1	NM_022159	0.00322533	0.77602	1.7124
3679959	EMP2	NM_001424	0.0012332	1.54402	2.91606
2458338	ENAH	NM_001008493	0.0122063	-0.7161	-1.64274
3226097	ENG	NM_000118	0.000242603	0.77307	1.7089
2618620	ENTPD3	NM_001248	0.0107978	2.1249	4.36173
2327677	EPB41	NM_203342	0.00561036	1.12251	2.17725
2632225	EPHA3	NM_005233	0.00722039	1.1589	2.23287
2655845	EPHB3	NM_004443	0.00261116	1.99148	3.97645
2382970	EPHX1	NM_000120	0.000815035	-0.61469	-1.53123
3511698	EPSTI1	NM_001002264	0.00200431	-0.70595	-1.63122
2821347	ERAP2	NM_022350	0.00451171	-0.92147	-1.89404
3931765	ERG	NM_001136154	0.00183303	0.70483	1.62995
2395177	ERRFI1	NM_018948	0.00390601	-0.87306	-1.83154
3921068	ETS2	NM_005239	0.00762253	0.59581	1.51132
3865248	EXOC3L2	NM_138568	0.00225551	0.85593	1.80993
3258260	EXOC6	NM_019053	0.00014367	0.59623	1.51176
3390195	EXPH5	NM_015065	0.00378695	-0.9204	-1.89264
3078348	EZH2	NM_004456	0.00559868	0.91141	1.88088
2863363	F2RL2	NM_004101	0.0219351	1.25782	2.39134
2423907	F3	NM_001993	0.00641907	-0.99946	-1.99925
3142381	FABP4	NM_001442	1.94011e-05	1.29976	2.46188
3333247	FADS2	NM_004265	0.00772677	0.6024	1.51824
3375582	FADS3	NM_021727	0.000469761	1.22356	2.33522
2802696	FAM105A	BC011524	0.000136288	-0.71436	-1.64076
2537171	FAM150B	NM_001002919	0.0127831	-0.97128	-1.96058
3459434	FAM19A2	NM_178539	0.000284454	1.91828	3.77972
2658785	FAM43A	NM_153690	0.00124238	1.27066	2.41272
2541699	FAM49A	NM_030797	0.00916142	0.72221	1.64971
3269694	FANK1	NM_145235	0.00156438	0.6329	1.55068
3257098	FAS	NM_000043	0.00384197	0.98804	1.98349
2742581	FAT4	NM_024582	0.00405367	1.35041	2.54985
3151607	FBXO32	NM_058229	0.000622724	1.87043	3.65642
3838624	FCGRT	NM_001136019	0.00112156	2.05035	4.14206
3381377	FCHSD2	NM_014824	0.00792027	0.78875	1.72758
3348189	FDX1	NM_004109	0.00395928	0.75712	1.69011
3523499	FGF14	NM_175929	0.00176527	1.44014	2.71347
2742109	FGF2	NM_002006	0.0106926	-0.9359	-1.91308
2761837	FGFBP2	NM_031950	0.00364382	0.68634	1.6092
3310041	FGFR2	NM_000141	0.000172599	0.94152	1.92055
3057955	FGL2	NM_006682	0.0192814	-0.79193	-1.73139
2568687	FHL2	NM_201555	0.00215417	-0.64536	-1.56413
3324447	FIBIN	NM_203371	0.0116856	-1.51235	-2.85274
3894601	FKBP1A	NM_000801	0.00251552	1.05798	2.08201
3750578	FLJ40504	AK097823	0.00414757	-0.93017	-1.9055
2468138	FLJ41046	AK123041	0.00884103	-0.61933	-1.53616
2697721	FLJ46210	NM_001134657	0.00438019	0.65748	1.57733
3546924	FLRT2	NM_013231	0.00205835	0.84117	1.7915
3507282	FLT1	NM_002019	0.00664418	0.67494	1.59653
3227159	FNBP1	NM_015033	0.00179266	0.81367	1.75768
3544525	FOS	NM_005252	0.00586287	0.62369	1.54081
2481271	FOXN2	NM_002158	0.00749243	-0.62296	-1.54003
3980745	FOXO4	NM_005938	0.000185033	1.20957	2.31269
2732655	FRAS1	NM_025074	0.00440258	-0.76766	-1.70251
3199511	FREM1	NM_144966	0.00450079	0.75576	1.68852
2809399	FST	NM_006350	0.0120696	-1.71278	-3.27792
2401643	FUCA1	NM_000147	0.00793194	0.58566	1.50073
2977510	FUCA2	NM_032020	0.000192174	-0.60411	-1.52004
2969886	FYN	NM_002037	0.000846412	0.6034	1.51929
3385509	FZD4	NM_012193	0.00363811	0.89614	1.86108
3585223	GABRA5	NM_000810	0.00873846	-0.72426	-1.65205
2836518	GALNT10	NM_198321	0.00224069	-0.6072	-1.5233
3464967	GALNT4	NM_003774	0.000748686	0.81055	1.75388
2511603	GALNT5	NM_014568	0.00143528	-0.91385	-1.88407
2751936	GALNT7	NM_017423	0.00532365	0.93858	1.91664
2637112	GAP43	NM_001130064	0.0134143	-0.73608	-1.66564
3213120	GAS1	NM_002048	0.00926083	0.82784	1.77503
2421883	GBP1	NM_002053	0.0218236	-0.81073	-1.7541
2421843	GBP3	NM_018284	7.12135e-06	-0.93373	-1.91021
2421925	GBP7	NM_207398	0.015936	-0.64896	-1.56804
3565524	GCH1	NM_000161	0.00154237	0.76667	1.70134
3824993	GDF15	NM_004864	0.000103447	0.90374	1.87091
2853885	GDNF	NM_000514	0.00313582	-1.11977	-2.17312
3144934	GEM	NM_005261	0.0215463	-0.7366	-1.66624
3308241	GFRA1	NM_005264	0.0045414	-1.10438	-2.15006
2877355	GFRA3	NM_001496	0.0111748	-0.69978	-1.62426
2807949	GHR	NM_000163	0.000618506	-0.6697	-1.59074
3031466	GIMAP8	NM_175571	9.34788e-05	1.06777	2.09619
2343334	GIPC2	NM_017655	0.000978594	0.59949	1.51518
3599709	GLCE	NM_015554	0.000340203	1.90318	3.74037
3698919	GLG1	NM_012201	0.00106942	1.1179	2.17031
3197140	GLIS3	NM_001042413	0.00215021	-0.67278	-1.59414
3739827	GLOD4	NM_016080	0.00328571	0.62733	1.5447
2447540	GLT25D2	NM_015101	0.0039894	0.70971	1.63548
3210737	GNA14	NM_004297	0.0129119	1.50498	2.83821
3661940	GNAO1	NM_020988	0.00840036	-1.04236	-2.05959
3012910	GNGT1	NM_021955	0.00231222	-0.60456	-1.52051
3761714	GNGT2	NM_031498	0.00190358	1.1372	2.19954
2858752	GNL3LP	AK022657	0.00604434	-0.69669	-1.62078
4022447	GPC3	NM_004484	0.00023482	-1.14696	-2.21447
2596257	GPR1	NM_005279	0.00271156	-0.99785	-1.99702
2909499	GPR115	NM_153838	0.00742193	-1.23477	-2.35344
2386747	GPR137B	NM_003272	0.00222501	1.6665	3.17444
3239437	GPR158	NM_020752	0.0197435	-1.1839	-2.2719
2417390	GPR177	NM_024911	0.00814257	-0.5989	-1.51456
3865503	GPR4	NM_005282	0.000286549	1.60998	3.05248
4001654	GPR64	NM_001079858	8.96554e-06	2.79567	6.94353
3547375	GPR65	NM_003608	0.00180633	0.88124	1.84196
2819779	GPR98	NM_032119	0.0139996	-0.72313	-1.65076
3353640	GRAMD1B	NM_020716	0.000225895	1.31788	2.493
2749222	GRIA2	NM_001083619	0.00569296	1.25547	2.38745
2406926	GRIK3	NM_000831	0.00323771	1.29974	2.46185
3267036	GRK5	NM_005308	0.000236467	1.70861	3.26846
2623308	GRM2	NM_000839	5.89117e-05	2.20984	4.62624
3970024	GRPR	NM_005314	0.0121071	-0.9655	-1.95274
2907066	GUCA1A	NM_000409	6.64216e-05	-0.73603	-1.66559
2748830	GUCY1A3	NM_000856	0.00458071	-0.88832	-1.85102
2748923	GUCY1B3	NM_000857	0.00990425	-0.58715	-1.50228
2519480	GULP1	NM_016315	0.00503943	-0.83735	-1.78677
3757288	HAP1	NM_177977	0.00771515	0.88712	1.84948
2692909	HEG1	NM_020733	0.000534569	-1.059	-2.08349
3354380	HEPN1	NM_001037558	0.0204743	0.79254	1.73212
3141755	HEY1	NM_012258	0.000722993	-0.62629	-1.54359
3258221	HHEX	NM_002729	0.0100151	0.99501	1.99309
2341645	HHLA3	NM_007071	0.00841663	-0.90898	-1.87772
2946232	HIST1H1C	NM_005319	0.00253183	-0.69411	-1.61789
2899152	HIST1H2AC	NM_003512	0.000469326	1.32994	2.51392
2899176	HIST1H2BD	NM_138720	0.000278249	2.17596	4.51886
2899768	HIST1H4I	NM_003495	0.00706235	-0.873	-1.83147
2604254	HJURP	NM_018410	0.00470793	-0.77897	-1.71591
2507896	HNMT	NM_006895	0.0188481	-1.03249	-2.04555
2338625	HOOK1	NM_015888	0.00138433	1.48689	2.80284
3042756	HOXA2	NM_006735	0.000938386	-0.78225	-1.71981
3042849	HOXA5	NM_019102	0.000546189	-0.87093	-1.82884
2378077	HSD11B1	NM_005525	0.011141	0.93691	1.91442
3671076	HSD17B2	NM_002153	0.00279162	2.83015	7.11148
3434012	HSPB8	NM_014365	0.00191864	0.96009	1.94543
3820443	ICAM1	NM_000201	0.000273352	1.3516	2.55195
3766621	ICAM2	NM_001099786	0.0105007	1.25664	2.38939
2468622	ID2	NM_002166	0.000770942	1.15755	2.23078
3273601	IDI1	NM_004508	0.0069633	0.67377	1.59524
4025339	IDS	NM_000202	0.00923608	0.73547	1.66494
2343473	IFI44L	NM_006820	0.0197275	-0.84539	-1.79675
3480411	IFT88	NM_175605	0.0202714	0.61007	1.52633
3468345	IGF1	NM_001111283	0.0100375	1.70579	3.26208
3049292	IGFBP3	NM_001013398	0.00827519	-1.13512	-2.19637
3721010	IGFBP4	NM_001552	0.00435604	0.5932	1.50859
3988538	IL13RA1	NM_001560	3.3077e-05	0.6066	1.52267
3391255	IL18	NM_001562	0.00382101	-1.93982	-3.83658
2571483	IL1A	NM_000575	0.000144971	1.9798	3.94438
2657831	IL1RAP	NM_002182	0.00514886	0.7496	1.68133
2857416	IL6ST	NM_002184	0.000264537	-0.7283	-1.65669
2731332	IL8	NM_000584	0.00176865	-1.28697	-2.44015
3359121	INS-IGF2	NR_003512	0.00156338	-0.8425	-1.79315
3848243	INSR	NM_000208	0.000227937	0.88726	1.84966
3497790	IPO5	NM_002271	0.00237061	0.6925	1.61608
2604998	IQCA1	NM_024726	0.000349029	-0.88284	-1.844
3692280	IRX3	NM_024336	0.00108482	0.92783	1.90241
3430776	ISCU	NM_014301	9.25609e-06	0.62273	1.53979
2809245	ITGA2	NM_002203	0.00010567	-0.87706	-1.83663
3934729	ITGB2	NM_000211	0.000485074	1.4735	2.77695
4013549	ITM2A	NM_004867	0.00205369	1.69183	3.23066
2416522	JAK1	NM_002227	0.00349904	0.6881	1.61116
2880361	JAKMIP2	NM_014790	0.00205396	1.53767	2.90325
2896177	JARID2	NM_004973	0.00149925	0.73331	1.66245
3544562	JDP2	NM_001135049	0.0175211	-0.69485	-1.61872
3140920	JPH1	NM_020647	0.00472146	1.28666	2.43963
2639734	KALRN	NM_007064	0.0143501	1.00953	2.01326
2613441	KAT2B	NM_003884	0.00612472	-0.78051	-1.71774
3507962	KATNAL1	NM_001014380	0.00191577	0.71812	1.64504
2427566	KCNA2	NM_004974	0.00015628	0.98476	1.97898
3908901	KCNB1	NM_004975	0.00665981	0.82371	1.76995
3930212	KCNE1	NM_000219	0.00195403	-0.79219	-1.7317
3381965	KCNE3	NM_005472	4.92762e-05	3.85853	14.5055
3909442	KCNG1	NM_002237	0.00763955	-0.92181	-1.89449
2584258	KCNH7	NM_033272	0.000637771	1.86284	3.63723
3296046	KCNMA1	NM_002247	0.0211199	-1.14559	-2.21237
3824666	KCNN1	NM_002248	4.2787e-07	1.25651	2.38917
3811459	KDSR	NM_002035	0.00140675	1.6216	3.07716
2474240	KHK	NM_000221	0.000747802	0.63444	1.55234
2717101	KIAA0232	NM_014743	0.0213555	-0.63542	-1.55339
3604147	KIAA1199	NM_018689	0.00178389	-0.65969	-1.57974
3161167	KIAA1432	NM_020829	0.00964657	0.5998	1.51551
3367338	KIF18A	NM_031217	9.42722e-06	-0.7235	-1.65118
2727587	KIT	NM_000222	0.0136573	2.14204	4.41386
4019160	KLHL13	NM_033495	0.00118607	1.2765	2.42251
3983324	KLHL4	NM_019117	0.00104593	-0.6615	-1.58173
2388085	KMO	NM_003679	0.00173638	3.70818	13.0699
3756656	KRTAP3-2	NM_031959	0.00135322	-0.72969	-1.65828
2508520	KYNU	NM_003937	0.0138838	-0.7727	-1.70846
2925510	L3MBTL3	NM_032438	0.0118439	0.73841	1.66834
2475678	LBH	NM_030915	0.000535987	1.71457	3.28199
2762088	LDB2	NM_001130834	0.00729834	0.6931	1.61675
3510450	LHFP	NM_005780	3.43045e-05	0.58619	1.50128
2326485	LIN28	NM_024674	0.00219349	-0.6148	-1.53135
2609347	LMCD1	NM_014583	0.00240657	-1.36883	-2.58261
2660029	LMLN	NM_001136049	0.00758179	0.67542	1.59706
3446137	LMO3	NM_018640	0.0208897	2.72348	6.60464
3267273	LOC100131848	AK097099	0.000191727	0.61349	1.52996
2522094	LOC26010	NM_001100422	6.21915e-05	-0.88679	-1.84906
2713709	LOC348840	NR_003291	0.0109442	0.79128	1.73061
3454821	LOC57228	NM_001033873	0.000510354	0.61199	1.52837
2609414	LOH3CR2A	BC016278	0.0217374	-0.80365	-1.74551
3125001	LONRF1	NM_152271	0.00571176	0.83844	1.78812
3220384	LPAR1	NM_057159	9.82574e-05	1.58975	3.00997
3982534	LPAR4	NM_005296	0.000350475	1.29898	2.46055
3088486	LPL	NM_000237	0.0178364	1.26999	2.4116
3202224	LRRC19	NM_022901	0.00383254	0.74101	1.67135
3071459	LRRC4	NM_022143	0.00807428	0.60043	1.51617
3424705	LRRIQ1	NM_001079910	0.00325935	0.97427	1.96465
2608309	LRRN1	NM_020873	0.00241048	-0.6093	-1.52552
3896594	LRRN4	NM_152611	0.00552447	-0.895	-1.85961
2690012	LSAMP	NM_002338	0.00798455	-1.34623	-2.54247
2746269	LSM6	NM_007080	0.0119755	-0.59663	-1.51218
3465248	LUM	NM_002345	0.00731082	-2.63986	-6.23271
2576988	LYPD1	NM_144586	0.0158886	-1.43979	-2.71281
3408573	LYRM5	NM_001001660	0.00573173	0.82163	1.7674
2747314	MAB21L2	NM_006439	2.08015e-05	-1.04665	-2.06573
2365597	MAEL	NM_032858	0.00524662	-0.69931	-1.62373
3905875	MAFB	NM_005461	5.56834e-05	1.31904	2.495
4026399	MAGEA1	NM_004988	0.00154976	0.88164	1.84247
3113180	MAL2	NM_052886	0.0142597	-0.8046	-1.74666
2779897	MANBA	NM_005908	0.00212519	-0.5949	-1.51037
3444906	MANSC1	NM_018050	0.00815961	1.08326	2.11882
3733065	MAP2K6	NM_002758	0.00172738	1.43786	2.70919
2574798	MAP3K2	NM_006609	0.00728962	-0.656	-1.57571
4002081	MAP7D2	NM_152780	1.55319e-05	3.30458	9.88047
3329069	MAPK8IP1	NM_005456	0.000558848	-0.60004	-1.51576
3723687	MAPT	NM_016835	0.00047017	2.53273	5.78666
2873897	MARCH3	NM_178450	0.000919564	-0.71937	-1.64646
2512330	MARCH7	NM_022826	0.016687	-0.6384	-1.5566
3553690	MARK3	NM_001128918	0.00017184	0.6459	1.56472
2709631	MASP1	NM_001879	0.000748142	-0.70144	-1.62613
3810749	MC4R	NM_005912	0.000720329	-0.66608	-1.58676
3205633	MCART1	NM_033412	1.00848e-05	0.77564	1.71195
2871241	MCC	NM_001085377	0.000551182	-0.77143	-1.70696
2971678	MCM9	AK299076	0.00770581	-0.83803	-1.78761
2867443	MCTP1	NM_024717	0.00197032	-0.73854	-1.66849
2647898	MED12L	NM_053002	0.00527707	-0.78045	-1.71767
3513395	MED4	NM_014166	0.00474097	0.65136	1.57065
2866225	MEF2C	NM_002397	0.0173964	-0.777	-1.71356
2827299	MEGF10	NM_032446	0.00891953	-1.15749	-2.23069
3844297	MGC2752	AK000827	0.00280461	0.69296	1.6166
2366355	MGC4473	NR_024160	0.00950611	0.74128	1.67166
3999395	MID1	NM_000381	0.011688	-0.95986	-1.94512
2340845	MIER1	NM_020948	0.00390606	-0.87577	-1.83499
3897431	MKKS	NM_018848	0.00354389	0.61933	1.53616
2648677	MME	NM_007288	0.00138835	-1.14144	-2.20601
3388807	MMP1	NM_002421	0.00246727	1.83594	3.57004
3887210	MMP9	NM_004994	6.28587e-06	2.4034	5.29049
2748163	MND1	NM_032117	0.0074202	0.81162	1.75518
2974413	MOXD1	NM_015529	0.00101749	-1.04776	-2.06732
3701837	MPHOSPH6	NM_005792	0.00249887	0.61683	1.5335
3393720	MPZL2	NM_144765	0.00210477	0.60438	1.52033
3379777	MRGPRF	NM_001098515	6.49274e-05	-0.70583	-1.63108
3426215	MRPL42	NM_014050	0.0115381	0.6246	1.54178
3332298	MS4A4A	NM_148975	0.0105635	-0.60164	-1.51744
3372368	MTCH2	NM_014342	0.00706477	0.6036	1.5195
3506936	MTIF3	NM_152912	0.00137052	0.72486	1.65274
3506153	MTMR6	NM_004685	0.00942657	0.6368	1.55488
3416702	MUCL1	NM_058173	4.16085e-05	0.80688	1.74942
3986168	MUM1L1	NM_152423	0.0020795	-0.73861	-1.66857
3115504	MYC	NM_002467	0.00251057	0.758	1.69114
2470838	MYCN	NM_005378	0.00253903	1.33306	2.51936
3744463	MYH10	NM_005964	0.0172371	0.5908	1.50608
3048447	MYL7	NM_021223	0.0091672	-0.84771	-1.79964
3710823	MYOCD	NM_153604	0.0186501	-0.85501	-1.80877
3082990	MYOM2	NM_003970	0.0189304	1.20399	2.30376
3508696	N4BP2L2	NM_014887	0.00464104	0.6974	1.62158
3266934	NANOS1	NM_199461	0.00815364	0.70788	1.6334
3065480	NAPEPLD	NM_001122838	0.000814928	-0.59135	-1.50666
2720251	NCAPG	NM_022346	0.0195381	-0.85063	-1.80329
2494484	NCAPH	NM_015341	0.00171931	-0.5898	-1.50504
2924514	NCOA7	NM_181782	0.00256536	-1.36603	-2.5776
2835531	NDST1	NM_001543	0.00378091	-0.6487	-1.56775
2740896	NDST3	NM_004784	0.00073059	1.29916	2.46086
3280573	NEBL	NM_006393	0.0207034	-1.14105	-2.20541
3942021	NEFH	NM_021076	0.000507121	0.6977	1.62192
2666884	NEK10	NM_152534	0.00175468	-0.6157	-1.5323
2373736	NEK7	NM_133494	0.00176199	-0.68943	-1.61265
3451814	NELL2	NM_006159	6.32912e-05	3.40333	10.5805
2343231	NEXN	NM_144573	0.00964746	-0.91128	-1.88071
2376168	NFASC	NM_015090	0.000414952	-0.6439	-1.56255
2737717	NFKB1	NM_003998	0.000960619	-0.62036	-1.53726
2666566	NGLY1	NM_018297	0.0151873	-0.69326	-1.61693
3693083	NIP30	NM_024946	0.00468971	0.61741	1.53412
3900545	NKX2-2	NM_002509	3.1028e-05	2.60276	6.07448
2319518	NMNAT1	NM_022787	0.00841425	-0.60648	-1.52254
2805635	NPR3	NM_000908	0.00718067	2.24971	4.75587
2792127	NPY1R	NM_000909	2.18755e-05	6.55613	94.1005
2750198	NPY5R	NM_006174	0.000654205	2.41841	5.34582
2879312	NR3C1	NM_000176	0.00451354	-0.78844	-1.72721
3633699	NRG4	NM_138573	0.0100886	0.59954	1.51523
3986087	NRK	NM_198465	0.000449249	0.66084	1.581
2349863	NTNG1	NM_001113226	6.08298e-06	0.9496	1.93134
3424898	NTS	NM_006183	0.00455277	1.45313	2.73801
4008427	NUDT11	NM_018159	0.000168609	0.79299	1.73266
3426169	NUDT4	NM_019094	0.00379173	0.92431	1.89778
4020655	ODZ1	NM_014253	0.0035678	0.74936	1.68105
3193725	OLFM1	NM_014279	0.00165335	0.84721	1.79902
3849894	OLFM2	NM_058164	0.00378443	0.83459	1.78335
2425652	OLFM3	NM_058170	1.58561e-06	2.37541	5.18883
2441043	OLFML2B	NM_015441	0.0101502	-0.84341	-1.79429
2352804	OLFML3	NM_020190	0.00110181	2.2715	4.82825
3444043	OLR1	NM_002543	1.51164e-05	-1.44801	-2.72831
3399004	OPCML	NM_001012393	0.00194183	3.17409	9.02602
3453078	OR10AD1	NM_001004134	0.0169434	-0.62065	-1.53757
2947703	OR2B3	BC136818	0.0199138	0.67897	1.601
2390089	OR2W5	NM_001004698	0.00980747	-0.67991	-1.60204
3361504	OR5P3	NM_153445	0.00263808	-0.59803	-1.51365
2439350	OR6N1	NM_001005185	0.00232249	0.59947	1.51516
2667809	OSBPL10	NM_017784	0.00927786	-0.61252	-1.52893
3041875	OSBPL3	NM_015550	0.0023116	-0.87258	-1.83093
2517588	OSBPL6	NM_032523	0.00668954	-0.58635	-1.50144
3566176	OTX2	NM_021728	0.000764262	1.60229	3.03625
2661992	OXTR	NM_000916	0.000730797	-1.18151	-2.26814
2398820	PADI2	NM_007365	0.00826228	1.83913	3.57794
2751066	PALLD	NM_016081	0.00905945	-0.82087	-1.76647
3186491	PAPPA	NM_002581	0.00256153	0.5947	1.51016
3599758	PAQR5	NM_001104554	0.00064032	1.84989	3.60473
3284596	PARD3	NM_019619	9.34705e-05	0.69188	1.61539
2524016	PARD3B	NM_152526	0.0102381	-0.69736	-1.62153
2323347	PAX7	NM_001135254	0.00524373	1.38169	2.60573
3983549	PCDH11X	NM_032968	0.00105829	1.77502	3.42243
3491486	PCDH17	NM_001040429	0.000194184	1.26589	2.40476
4047493	PCDH18	NM_019035	0.00417295	-1.23664	-2.35649
2722823	PCDH7	NM_032456	3.55617e-05	-0.66811	-1.58899
3894047	PCMTD2	NM_018257	1.51041e-06	0.63543	1.5534
2698996	PCOLCE2	NM_013363	2.63707e-05	-0.6953	-1.61922
3877892	PCSK2	NM_002594	0.000355522	2.31173	4.96478
3044597	PDE1C	NM_005020	0.0115404	-1.0898	-2.12845
3407453	PDE3A	NM_000921	0.000645686	-0.82312	-1.76923
2783596	PDE5A	NM_001083	0.00210198	-1.92497	-3.79729
2791197	PDGFC	NM_016205	0.00584543	-0.93239	-1.90843
3389077	PDGFD	NM_025208	0.0188149	0.73803	1.6679
2727226	PDGFRA	NM_006206	0.000953172	-0.70387	-1.62887
2881239	PDGFRB	NM_002609	0.000235494	-0.61373	-1.53021
3087703	PDGFRL	NM_006207	0.00452738	-0.65346	-1.57294
2639225	PDIA5	NM_006810	0.00264477	0.63431	1.5522
3484768	PDS5B	NM_015032	0.00521397	0.67671	1.59849
3013255	PEG10	NM_015068	0.00146542	-1.08591	-2.12271
3012064	PFTK1	NM_012395	0.000128062	1.10396	2.14944
2339786	PGM1	NM_002633	0.00514006	-0.60907	-1.52528
3381925	PGM2L1	NM_173582	6.65256e-05	1.52472	2.87731
2743315	PHF17	NM_199320	0.0106756	-1.0026	-2.00361
3223687	PHF19	NM_015651	0.0196364	-0.70967	-1.63543
2635906	PHLDB2	NM_001134438	0.0129917	-0.59935	-1.51503
3761725	PHOSPHO1	NM_178500	0.00236701	3.27424	9.67485
3259978	PI4K2A	NM_018425	5.0375e-07	0.67398	1.59547
3786039	PIK3C3	NM_002647	0.00103843	1.05738	2.08115
3018309	PIK3CG	NM_002649	0.000773081	1.53524	2.89837
3740304	PITPNA	NM_006224	0.000118378	0.613	1.52944
2372211	PLA2G4A	NM_024420	0.0072565	-1.34381	-2.53821
2775909	PLAC8	NM_016619	0.00675863	-1.17386	-2.25615
3133233	PLAT	NM_000930	0.011685	-0.79989	-1.74097
3258477	PLCE1	NM_016341	0.0205933	-0.73125	-1.66008
2858023	PLK2	NM_006622	0.00254177	-0.8475	-1.79938
2923270	PLN	NM_002667	0.00092973	-1.09995	-2.14347
2645906	PLS1	NM_002670	0.000584992	-0.76124	-1.69495
3854417	PLVAP	NM_031310	0.00180745	1.50753	2.84323
2453365	PLXNA2	NM_025179	0.00452648	0.67915	1.6012
2453370	PLXNA2	NM_025179	0.000345741	0.59053	1.5058
2989269	PMS2CL	NR_002217	0.00282054	-0.61528	-1.53186
2816030	POLK	NM_016218	0.0205465	-0.63005	-1.54762
3510066	POSTN	NM_006475	0.012954	-1.75614	-3.37793
3518940	POU4F1	NM_006237	0.0065351	0.77079	1.7062
2414366	PPAP2B	NM_003713	0.00203664	-1.08523	-2.12171
2611056	PPARG	NM_138712	0.000175923	-0.87203	-1.83024
3456840	PPP1R1A	NM_006741	1.65092e-05	1.87368	3.66466
3300115	PPP1R3C	NM_005398	0.00245936	-0.9325	-1.90858
2379009	PPP2R5A	NM_006243	0.016174	-0.65781	-1.57769
2919669	PRDM1	NM_001198	0.01754	-0.58932	-1.50454
3139690	PRDM14	NM_024504	0.0219739	0.87768	1.83742
3908631	PREX1	NM_020820	5.1763e-05	1.22871	2.34357
2679917	PRICKLE2	NM_198859	0.00519955	-1.54547	-2.91899
3653123	PRKCB	NM_002738	0.000254964	3.48492	11.1961
2316245	PRKCZ	NM_001033582	0.00106576	-0.62956	-1.54709
3343452	PRSS23	NM_007173	0.0102889	-0.6446	-1.56331
2915420	PRSS35	NM_153362	0.00197279	1.19562	2.29043
3768103	PSMD12	NM_002816	5.38383e-05	0.68636	1.60922
2417945	PTGER3	NM_198715	0.0039372	1.26651	2.40579
2807621	PTGER4	NM_000958	3.566e-05	-0.94906	-1.93061
2448382	PTGS2	NM_000963	0.0109225	-0.95904	-1.94402
3448744	PTHLH	NM_198965	0.000126685	-0.99889	-1.99846
2734629	PTPN13	NM_080683	0.000342343	1.42191	2.6794
2428796	PTPN22	NM_015967	7.30355e-05	2.60857	6.09899
3365601	PTPN5	NM_006906	0.00030807	1.40009	2.63918
3198346	PTPRD	NM_002839	0.00176825	-0.63295	-1.55073
2626802	PTPRG	NM_002841	0.0130613	0.65662	1.57639
2600089	PTPRN	NM_002846	0.00407233	-0.77744	-1.71409
3934695	PTTG1IP	NM_004339	0.000364281	0.7639	1.69807
2649367	PTX3	NM_002852	0.010459	-0.60608	-1.52212
3130294	PURG	NM_001015508	0.00222917	0.76336	1.69744
2626167	PXK	NM_017771	0.0184033	-0.65506	-1.57468
3788976	RAB27B	NM_004163	0.0100708	-1.21118	-2.31527
2810805	RAB3C	NM_138453	0.000340534	0.87696	1.8365
3375612	RAB3IL1	NM_013401	0.0144221	0.59176	1.50708
3722039	RAMP2	NM_005854	1.40986e-05	0.84245	1.79309
2840425	RANBP17	NM_022897	0.000912787	-0.58636	-1.50145
2853426	RANBP3L	NM_145000	0.00995114	-0.81219	-1.75587
2614369	RARB	NM_000965	7.41888e-06	-0.83305	-1.78145
3079005	RARRES2	NM_002889	0.00972929	1.16911	2.24873
2369110	RASAL2	NM_170692	0.00242807	-0.85103	-1.80379
2476671	RASGRP3	NM_170672	0.01652	0.64354	1.56216
3896034	RASSF2	NM_014737	5.93543e-05	0.62284	1.5399
2546054	RBKS	NM_022128	0.00454247	-0.78408	-1.72199
3543411	RBM25	NM_021239	0.000470526	0.6075	1.52362
2615060	RBMS3	NM_001003793	2.55048e-05	-0.86977	-1.82737
3838665	RCN3	NM_020650	0.0093875	0.61624	1.53287
3553228	RCOR1	NM_015156	7.45875e-05	0.76111	1.69479
3249043	REEP3	BC018658	0.00238542	0.74826	1.67977
3065740	RELN	NM_005045	0.0155423	1.96313	3.89907
2820893	RFESD	NM_001131065	0.0179076	-0.62727	-1.54464
2664640	RFTN1	NM_015150	0.00100637	-0.68992	-1.61319
2372858	RGS2	NM_002923	0.000866417	-0.62268	-1.53973
2724671	RHOH	NM_004310	0.000160577	2.38948	5.23968
3110395	RIMS2	NM_001100117	0.0145958	-0.77591	-1.71227
3106243	RIPK2	NM_003821	0.00223707	-0.78829	-1.72703
3555675	RNASE1	NM_198232	0.00139409	0.84581	1.79727
2580802	RND3	NM_005168	0.000235447	-0.697	-1.62113
3070499	RNF133	NM_139175	0.00352922	2.93375	7.64094
2897172	RNF144B	NM_182757	0.0124553	-0.80166	-1.74311
3070507	RNF148	NM_198085	0.00635501	2.47593	5.56326
2895792	RNF182	NM_152737	0.00131223	0.77006	1.70534
2692640	ROPN1	NM_017578	0.00650417	-0.78284	-1.72051
3627422	RORA	NM_134260	0.000686343	0.87849	1.83845
2924851	RSPO3	NM_032784	0.00116668	-1.32245	-2.5009
2908762	RUNX2	NM_001024630	0.00027824	-0.96598	-1.95339
2387126	RYR2	NM_001035	0.0107728	1.42282	2.68109
3935486	S100B	NM_006272	0.000255662	-0.71072	-1.63662
2349129	S1PR1	NM_001400	0.000272672	1.32408	2.50373
3633148	SCAMP2	NM_005697	0.00389847	0.58551	1.50057
3091475	SCARA3	NM_016240	0.00269991	-0.72036	-1.64759
2785282	SCLT1	NM_144643	0.000843756	-0.91114	-1.88053
2408499	SCMH1	NM_001031694	0.00130605	-0.65141	-1.5707
3652867	SCNN1G	NM_001039	0.0089803	2.1366	4.39725
2336585	SCP2	NM_002979	0.000300361	-0.70753	-1.63301
3907234	SDC4	NM_002999	0.00151088	-0.77575	-1.71208
2987843	SDK1	NM_152744	0.015457	0.72071	1.64799
3059393	SEMA3E	NM_012431	1.85009e-05	-0.82976	-1.77739
2847967	SEMA5A	NM_003966	0.000554757	-0.80506	-1.74722
2692199	SEMA5B	NM_001031702	0.000647599	2.98271	7.9047
4019486	SEPT6	NM_145799	0.00196309	0.6644	1.58491
2601414	SERPINE2	NM_001136529	0.00129704	0.7355	1.66497
3786471	SETBP1	NM_015559	0.00137487	-0.60514	-1.52113
3132782	SFRP1	NM_003012	0.0065591	-0.69691	-1.62103
2975014	SGK1	NM_005627	0.0181981	0.7124	1.63853
2738664	SGMS2	NM_001136258	2.39328e-05	-0.59196	-1.50729
2665572	SGOL1	NM_001012410	0.000215297	-0.72374	-1.65146
3431892	SH2B3	NM_005475	0.00467202	0.61193	1.5283
2441220	SH2D1B	NM_053282	0.00567853	0.63011	1.54768
3088213	SH2D4A	NM_022071	0.00412371	-1.05893	-2.08339
2833924	SH3RF2	NM_152550	0.000757692	-0.88132	-1.84206
3920171	SIM2	NM_009586	2.28068e-06	1.72983	3.31689
3494706	SLAIN1	NM_001040153	0.00728427	2.16678	4.4902
3867842	SLC17A7	NM_020309	8.53811e-05	1.874	3.66547
3160658	SLC1A1	NM_004170	0.0103528	0.92912	1.90411
2806643	SLC1A3	NM_004172	0.00342913	-1.1355	-2.19695
2939298	SLC22A23	NM_015482	0.0114252	-0.7023	-1.6271
2934521	SLC22A3	NM_021977	0.000521838	-1.06147	-2.08706
3878619	SLC24A3	NM_020689	8.52834e-05	2.00118	4.00327
3292779	SLC25A16	ENST00000395148	0.00779656	0.60132	1.5171
2835300	SLC26A2	NM_000112	0.00274295	1.27649	2.42249
3089360	SLC39A14	NM_001128431	6.56113e-05	-0.84715	-1.79894
2779823	SLC39A8	NM_022154	0.0013243	-1.04533	-2.06384
2591837	SLC40A1	NM_014585	0.00650482	-1.3402	-2.53186
3373893	SLC43A1	NM_003627	0.00417334	1.34276	2.53636
2730746	SLC4A4	NM_001098484	0.0185524	-0.59652	-1.51206
2545549	SLC5A6	NM_021095	0.0024721	1.22055	2.33036
3087659	SLC7A2	NM_003046	0.0102595	-0.67142	-1.59264
3557209	SLC7A8	NM_012244	0.00788763	0.61254	1.52895
2549565	SLC8A1	NM_021097	0.0005022	-0.7242	-1.65198
4006841	SLC9A7	NM_032591	1.94536e-05	1.19381	2.28756
3608787	SLCO3A1	NM_013272	0.000616393	0.69626	1.6203
3139580	SLCO5A1	NM_030958	4.33205e-05	3.13878	8.80779
3753500	SLFN11	NM_001104587	3.16934e-06	1.57381	2.9769
3753538	SLFN12	NM_018042	0.00130627	0.87008	1.82776
3598959	SMAD3	NM_005902	0.00298372	-0.71336	-1.63962
2464909	SMYD3	NM_022743	0.0124066	-0.64418	-1.56285
3134511	SNAI2	NM_003068	0.00491972	-1.60517	-3.04232
3876245	SNAP25	NM_003081	0.000688817	0.63132	1.54898
3761632	SNF8	NM_007241	0.00104561	0.63228	1.55001
3838185	SNRNP70	NM_003089	8.14401e-05	0.694	1.61776
3877776	SNRPB2	NM_003092	0.00772994	1.06908	2.09809
2754582	SNX25	NM_031953	0.00330617	-0.80306	-1.7448
2797202	SORBS2	AF090937	0.00326724	0.65666	1.57643
3592109	SORD	NM_003104	6.08988e-05	0.99779	1.99694
3364306	SOX6	NM_017508	0.000343992	1.99044	3.97358
2531233	SP140	NM_007237	0.0163245	-0.8868	-1.84907
2876897	SPOCK1	NM_004598	0.00816165	-1.22928	-2.3445
2508016	SPOPL	NM_001001664	0.00733937	-0.61989	-1.53676
2319252	SPSB1	NM_025106	0.00549834	-0.75497	-1.6876
2645315	SPSB4	NM_080862	0.00524399	-0.65863	-1.57858
2864849	SSBP2	NM_012446	0.00665669	-0.83105	-1.77898
3635159	ST20	NM_001100879	0.00704763	0.58875	1.50394
2633256	ST3GAL6	NM_006100	6.73407e-05	-0.85977	-1.81475
2342738	ST6GALNAC3	NM_152996	4.47961e-05	-0.67477	-1.59634
3609004	ST8SIA2	NM_006011	0.000894024	1.37803	2.59913
3608952	ST8SIA2	NM_006011	0.000548498	0.82209	1.76797
3789680	ST8SIA3	NM_015879	0.00648963	0.75109	1.68306
3806459	ST8SIA5	NM_013305	0.00320317	0.62434	1.54151
2616804	STAC	NM_003149	0.00696205	-1.15252	-2.22302
3131819	STAR	NM_000349	0.00211193	0.63366	1.5515
3508898	STARD13	NM_178006	0.00437435	1.09267	2.13268
3980078	STARD8	NM_014725	0.000371458	0.6465	1.56537
3011861	STEAP2	NM_152999	0.00142537	2.96093	7.78626
2502762	STEAP3	NM_182915	0.000689292	1.19195	2.28461
2622063	STGC3	AY078383	0.00224289	-0.86689	-1.82373
2593159	STK17B	NM_004226	0.00654728	-1.18756	-2.27767
2481379	STON1-GTF2A1L	NM_172311	0.00516617	-0.81323	-1.75714
3224591	STRBP	NM_018387	0.000448408	0.71247	1.63861
2929870	STXBP5	NM_001127715	0.0117659	-0.6729	-1.59427
3539724	SYNE2	NM_182914	0.000164957	0.76206	1.69591
2627251	SYNPR	NM_001130003	3.48862e-05	1.00899	2.0125
3423622	SYT1	NM_001135805	0.0218063	0.7752	1.71143
3450362	SYT10	NM_198992	0.00253016	-1.01088	-2.01514
2428932	SYT6	NM_205848	0.000167373	2.28431	4.87131
3973891	SYTL5	NM_138780	0.00822766	-0.61573	-1.53233
2411198	TAL1	NM_003189	7.16998e-06	0.96683	1.95454
3808854	TCF4	NM_001083962	0.000353475	0.77511	1.71132
2340819	TCTEX1D1	NM_152665	1.19006e-06	1.0128	2.01782
3594986	TEX9	NM_198524	0.00453876	0.63394	1.5518
2909948	TFAP2B	NM_003221	0.00546597	2.07362	4.20942
2829947	TGFBI	NM_000358	0.000123038	-0.858	-1.81252
3905145	TGM2	NM_004613	0.000100369	-0.97514	-1.96583
3422215	THAP2	NM_031435	0.0110173	0.63998	1.55831
3399623	THYN1	NM_014174	0.00636485	0.6763	1.59804
2932508	TIAM2	NM_012454	0.0122365	-1.09713	-2.13929
2735598	TIGD2	NM_145715	0.020469	-0.75392	-1.68637
3976341	TIMP1	NM_003254	1.99179e-05	1.0666	2.09449
2328320	TINAGL1	NM_022164	0.0158288	-0.77839	-1.71522
3211579	TLE1	NM_005077	0.00827936	-0.856	-1.81001
2754937	TLR3	NM_003265	0.00387101	-0.88509	-1.84688
2766262	TLR6	NM_006068	0.00802599	-0.90088	-1.8672
2592598	TMEFF2	NM_016192	1.96799e-05	3.87192	14.6408
2375500	TMEM183A	NM_138391	0.0210569	-0.6922	-1.61575
2347732	TMEM56	NM_152487	0.000268704	-0.77803	-1.71479
3154185	TMEM71	NM_144649	0.000236354	0.89912	1.86493
3599669	TMEM84	AK292174	0.00154904	2.25549	4.77496
2927506	TNFAIP3	NM_006290	0.00890614	-0.69872	-1.62306
2956052	TNFRSF21	NM_014452	0.000606599	-0.94292	-1.92242
2444283	TNFSF4	NM_003326	0.00230487	-1.2837	-2.43463
2705266	TNIK	NM_015028	0.00687715	-1.40538	-2.64888
3049522	TNS3	NM_022748	0.000439427	-1.29484	-2.4535
3886294	TOX2	NM_032883	0.000706643	2.05383	4.15207
2972411	TRDN	NM_006073	8.9652e-05	3.02678	8.14989
2954022	TRERF1	AM404182	0.0116884	-0.76362	-1.69775
3422458	TRHDE	NM_013381	0.0037098	3.36872	10.3297
2470165	TRIB2	NM_021643	0.000919728	1.87619	3.67104
3330551	TRIM48	NM_024114	0.00572361	-0.70615	-1.63144
3101514	TRIM55	NM_033058	0.0111477	-1.25432	-2.38555
3858285	TSHZ3	NM_020856	7.20139e-05	1.56149	2.95159
3410056	TSPAN11	AY358804	1.77406e-05	0.78082	1.71811
2429371	TSPAN2	NM_005725	0.00173109	-0.66354	-1.58396
2588965	TTC30B	NM_152517	0.0207082	0.63876	1.55699
3544678	TTLL5	NM_015072	0.00011757	0.63367	1.55151
4029286	TTTY12	NR_001551	0.00375253	0.65549	1.57515
3734236	TTYH2	NM_032646	0.00633532	1.81393	3.51599
3453837	TUBA1A	NM_006009	0.00563841	0.7254	1.65336
2358993	TUFT1	NM_020127	0.004155	-0.64263	-1.56117
2962683	UBE2CBP	NM_198920	2.12781e-05	0.70472	1.62983
2853325	UGT3A2	NM_174914	0.000364036	4.37815	20.7948
3167731	UNC13B	NM_006377	1.5688e-07	0.66221	1.5825
2778440	UNC5C	NM_003728	2.58952e-05	-0.9379	-1.91574
2741236	USP53	NM_019050	0.00300378	-0.6335	-1.55132
3277468	USP6NL	NM_001080491	1.39498e-06	0.62895	1.54644
2395123	UTS2	NM_021995	0.000869727	1.09023	2.12908
3545130	VASH1	NM_014909	2.71466e-05	0.73733	1.66709
2794792	VEGFC	NM_005429	0.000152107	-0.80003	-1.74114
2684851	VGLL3	NM_016206	0.00330378	-1.12493	-2.18091
3550485	VRK1	NM_003384	1.19646e-05	0.76829	1.70325
3353914	VWA5A	NM_001130142	0.000526538	1.55295	2.93416
3007024	WBSCR17	NM_022479	0.0195218	0.60586	1.52189
3490251	WDFY2	NM_052950	0.000202603	1.12152	2.17576
3464912	WDR51B	NM_172240	2.48424e-05	1.17561	2.25888
3114064	WDR67	NM_145647	0.0154867	-0.61133	-1.52767
3116839	WISP1	NM_003882	0.000245563	-0.92414	-1.89755
3669650	WWOX	NM_016373	4.99371e-06	0.83378	1.78235
2818454	XRCC4	NM_022550	0.00175546	-1.43892	-2.71118
3954206	YPEL1	NM_013313	0.0175856	0.59467	1.51013
3349719	ZBTB16	NM_006006	8.41169e-08	0.73304	1.66214
3512769	ZC3H13	NM_015070	0.000154079	0.86528	1.82169
3988596	ZCCHC12	NM_173798	0.00214779	4.3153	19.9083
3199431	ZDHHC21	NM_178566	0.000103543	1.62015	3.07407
2755567	ZFP42	NM_174900	0.00206736	-0.66881	-1.58976
3553947	ZFYVE21	NM_024071	0.0100515	0.83596	1.78504
2808290	ZNF131	NM_003432	0.00945754	-0.5987	-1.51435
3286393	ZNF32	NM_006973	1.84047e-05	0.6546	1.57418
3983154	ZNF711	NM_021998	0.00455659	0.75675	1.68968
3843452	ZSCAN4	NM_152677	0.00517925	-0.97217	-1.96179
2336539	ZYG11A	AY271826	0.00332427	-0.96031	-1.94573
3139557		---	0.0208949	1.11945	2.17264
2895945		---	0.00599075	0.86591	1.82249
3842755		---	0.017505	0.75225	1.68442
3609553		---	0.00805	0.74456	1.67546
3843934		---	0.000663252	0.64842	1.56745
2569881		---	0.0170433	-0.66481	-1.58536
2793198		---	0.00271675	-0.60755	-1.52367
3057499		---	0.00230979	-0.80282	-1.74451
3421285		---	0.000390541	-0.58758	-1.50272

## Sheet: Table S1B
Gene Symbol	Induced or repressed in hNC-MSC	Induced or repressed in BM-MSC (Riggi et al 2008)	Induced or repressed in pBM-MSC k/o media (Riggi et al 2010)	Induced or repressed in ESFT cell lines (Kauer 2009)
AADACL1	REP		REP
ABCA5	IND	IND	IND
ABCA6	IND
ABCB4	REP		REP
ABCC4	IND		IND
ABCC9	IND
ABCG2	REP
ACACB	IND	IND	IND
ACPP	REP
ACSL1	REP
ACTA2	IND
ACTC1	REP
ACTG2	REP
ACTN2	IND		IND	IND
ACTR6	IND
ADAMTS1	REP		REP
ADAMTS3	REP	IND	REP
ADAMTSL1	REP		REP
ADCY5	IND
ADORA2A	REP
ADRA1D	IND
ADRB3	IND	IND	IND
AFAP1L2	REP
AFF3	REP		REP
AK3	IND
AKAP7	IND	IND	IND	IND
ALCAM	IND		REP
ALG6	IND	IND	IND	IND
ALK	IND	IND	IND
ALPL	IND
ANKH	IND
ANKRD26L1	REP
ANKRD6	REP
ANLN	REP	REP	REP
AP4B1	IND	IND	IND
APLN	IND
ARHGEF3	REP		REP
ARHGEF6	IND	IND	IND
ARP11	IND
ARRB1	IND		IND
ARSJ	REP		REP
AS3MT	IND		IND
ASAM	IND
ASPM	REP	REP	REP
ATF7	IND
ATG16L1	IND	IND
ATP10D	REP
ATP11C	IND
ATP1A1	IND	IND	IND	IND
ATP1A3	IND
ATP2B4	REP
ATP7A	IND
ATP8B1	IND
B3GALT2	REP
BAG2	REP		REP
BAHCC1	IND		IND
BBX	REP
BCAR3	REP
BCL11B	IND	IND	IND	IND
BCL2	IND
BCL6B	IND
BDKRB1	REP	REP
BDKRB2	REP		REP
BDP1	IND		IND
BGN	IND		IND
BHLHE40	REP
BMP5	REP
BOC	REP		REP
BRIP1	REP
BTN2A2	REP
BTN3A1	REP
BUB1	REP			IND
C11orf74	IND
C12orf48	IND
C12orf51	IND
C13orf15	REP		REP
C13orf18	IND	IND	IND	IND
C15orf27	IND
C15orf49	REP
C18orf32	IND
C1orf161	IND		IND
C1orf198	REP
C1QTNF3	IND
C21orf59	IND
C21orf63	IND	IND	IND
C3	REP
C3orf52	REP
C3orf59	REP
C4orf27	IND
C4orf29	REP
C4orf49	REP
C5orf23	IND		REP
C5orf46	REP
C6orf141	IND
C6orf192	IND		IND
C7orf53	REP
C7orf58	REP		REP
C8orf79	IND		IND
C8orf79	IND		IND
C9orf68	IND
C9orf70	REP
CA3	REP
CA8	IND		IND
CAB39L	IND
CABLES1	IND		REP
CACHD1	IND	IND
CADM1	REP		REP
CADPS2	IND	IND	IND	IND
CALB2	REP
CALCR	REP
CALM1	IND		IND
CAMK1G	IND		IND
CAPN6	IND		IND
CARD8	IND		IND
CASP8	REP
CCDC136	REP
CCDC144A	REP
CCDC155	IND
CCDC80	REP		REP
CCL28	REP
CCNA2	REP			IND
CCNB1IP1	IND
CCND1	IND			IND
CD24	IND			REP
CD34	IND
CD4	IND
CD83	IND		IND	IND
CDC20	REP		REP
CDC37L1	IND	IND	IND
CDC42BPA	IND
CDC42EP3	REP		REP	REP
CDCA2	REP		REP
CDCA7L	REP
CDH10	REP
CDH12	IND		IND
CDH6	REP
CDH8	IND		IND
CDK6	REP
CDKN3	REP		REP	IND
CDS1	IND	IND	IND
CEACAM1	IND	IND	IND
CEP70	REP
CER1	IND
CHMP5	IND
CHORDC1	IND
CHRM2	IND
CLCA2	IND	IND
CLDN1	IND	IND	IND
CLDN16	IND
CLEC1A	IND
CLEC2D	IND
CLSTN2	REP	IND	IND
CNIH3	REP		IND
CNKSR3	REP		REP
CNR1	REP
CNTN1	IND		IND
CNTN5	IND
COL15A1	IND
COL21A1	IND	IND	IND
COL3A1	REP		IND	REP
COMMD3	IND
CPA4	REP
CPE	REP
CPEB2	IND
CRABP2	REP
CREB3L2	REP			REP
CRLF1	IND
CSPG5	IND	IND	IND	IND
CTTNBP2	IND	IND
CWC15	IND
CXCL2	REP
CXCL6	REP	REP
CXCR4	REP		IND
CXorf23	IND
CYP1B1	REP		REP
CYP27A1	REP
CYP2R1	IND	IND	IND
CYP7B1	IND
CYYR1	IND	IND	IND
DAPK1	IND	IND	IND	IND
DAPK2	IND
DBC1	IND	IND	IND
DCBLD1	REP
DCC	IND
DCLRE1B	IND	IND	IND	IND
DCTPP1	IND
DCX	IND		IND
DENND1B	REP
DENND2C	IND		IND
DEPDC1	REP	REP	REP
DGKD	IND	IND	IND
DIO2	REP
DIO3	IND
DKFZP564O0823	REP		IND
DLC1	IND
DLG2	IND		IND
DLG2	IND		IND
DLX5	REP		IND
DNAH17	IND
DNAJA2	IND
DNAJC12	IND	IND	IND	IND
DNAJC6	REP
DPF3	IND
DPP4	IND
DPYD	REP	REP	REP
DPYSL3	REP	REP	REP
DRD2	IND
DSEL	IND
DTX3L	REP		IND
DUSP10	REP		REP
DUSP6	IND	IND		REP
DUSP7	IND	IND
DYNLL1	IND
EDNRA	IND	IND	IND
EDNRB	REP
EFEMP1	REP		REP
EFNB1	IND		IND	IND
EGR2	IND	IND	IND
EHBP1	REP
EIF3E	IND
ELL2	REP			REP
ELN	IND
ELOVL2	REP
ELTD1	IND		IND
EMP2	IND		IND
ENAH	REP		REP
ENG	IND
ENTPD3	IND	IND	IND
EPB41	IND		IND	IND
EPHA3	IND	IND
EPHB3	IND
EPHX1	REP
EPSTI1	REP		IND
ERAP2	REP		IND
ERG	IND		REP
ERRFI1	REP		REP
ETS2	IND			IND
EXOC3L2	IND
EXOC6	IND
EXPH5	REP
EZH2	IND	IND	IND	IND
F2RL2	IND		REP
F3	REP
FABP4	IND	IND
FADS2	IND
FADS3	IND		IND
FAM105A	REP
FAM150B	REP
FAM19A2	IND		IND
FAM43A	IND	IND	IND
FAM49A	IND		IND
FANK1	IND
FAS	IND
FAT4	IND	IND
FBXO32	IND		REP
FCGRT	IND	IND	IND	IND
FCHSD2	IND
FDX1	IND			IND
FGF14	IND
FGF2	REP
FGFBP2	IND		IND
FGFR2	IND		REP
FGL2	REP		REP
FHL2	REP		REP
FIBIN	REP
FKBP1A	IND		IND
FLJ40504	REP
FLJ41046	REP
FLJ46210	IND
FLRT2	IND
FLT1	IND
FNBP1	IND	IND		IND
FOS	IND	IND	IND	IND
FOXN2	REP
FOXO4	IND
FRAS1	REP
FREM1	IND	IND	IND
FST	REP		REP
FUCA1	IND		IND
FUCA2	REP
FYN	IND
FZD4	IND	IND	IND
GABRA5	REP
GALNT10	REP
GALNT4	IND
GALNT5	REP		REP
GALNT7	IND
GAP43	REP		REP
GAS1	IND
GBP1	REP		IND
GBP3	REP
GBP7	REP
GCH1	IND	IND	IND
GDF15	IND	IND
GDNF	REP
GEM	REP		REP
GFRA1	REP
GFRA3	REP
GHR	REP		REP
GIMAP8	IND	IND	IND
GIPC2	IND
GLCE	IND	IND	IND
GLG1	IND		IND	IND
GLIS3	REP		REP
GLOD4	IND
GLT25D2	IND	IND	IND
GNA14	IND	IND	IND	IND
GNAO1	REP
GNGT1	REP
GNGT2	IND
GNL3LP	REP
GPC3	REP
GPR1	REP
GPR115	REP
GPR137B	IND	IND	IND
GPR158	REP
GPR177	REP	REP
GPR4	IND
GPR64	IND	IND	IND
GPR65	IND
GPR98	REP		IND
GRAMD1B	IND		IND
GRIA2	IND	IND	IND
GRIK3	IND
GRK5	IND	IND	IND	IND
GRM2	IND		IND
GRPR	REP
GUCA1A	REP
GUCY1A3	REP
GUCY1B3	REP
GULP1	REP	REP	REP
HAP1	IND		IND
HEG1	REP	REP	REP
HEPN1	IND
HEY1	REP		IND	REP
HHEX	IND
HHLA3	REP
HIST1H1C	REP
HIST1H2AC	IND	IND	IND
HIST1H2BD	IND		IND
HIST1H4I	REP
HJURP	REP
HNMT	REP	REP	REP
HOOK1	IND		IND	IND
HOXA2	REP		REP
HOXA5	REP
HSD11B1	IND
HSD17B2	IND	IND	IND
HSPB8	IND	IND
ICAM1	IND	IND	IND
ICAM2	IND	IND	IND
ID2	IND	IND	IND
IDI1	IND
IDS	IND			REP
IFI44L	REP		IND
IFT88	IND
IGF1	IND	IND	REP
IGFBP3	REP		REP
IGFBP4	IND		REP
IL13RA1	IND	IND		REP
IL18	REP
IL1A	IND
IL1RAP	IND	IND	IND	IND
IL6ST	REP		REP	REP
IL8	REP
INS-IGF2	REP
INSR	IND		IND
IPO5	IND
IQCA1	REP
IRX3	IND		IND
ISCU	IND
ITGA2	REP
ITGB2	IND	IND	IND	IND
ITM2A	IND	IND	IND
JAK1	IND	IND	IND
JAKMIP2	IND		IND
JARID2	IND	IND	IND
JDP2	REP
JPH1	IND	IND	IND
KALRN	IND		IND
KAT2B	REP
KATNAL1	IND
KCNA2	IND		IND
KCNB1	IND
KCNE1	REP
KCNE3	IND	IND	IND
KCNG1	REP
KCNH7	IND
KCNMA1	REP		REP
KCNN1	IND		IND
KDSR	IND		IND	IND
KHK	IND		IND
KIAA0232	REP		IND
KIAA1199	REP		REP
KIAA1432	IND
KIF18A	REP
KIT	IND	IND	IND
KLHL13	IND	IND
KLHL4	REP
KMO	IND	IND	IND
KRTAP3-2	REP
KYNU	REP
L3MBTL3	IND	IND	IND
LBH	IND		IND	IND
LDB2	IND	IND	IND	IND
LHFP	IND			IND
LIN28	REP
LMCD1	REP		REP
LMLN	IND
LMO3	IND	IND	IND
LOC100131848	IND
LOC26010	REP		REP	REP
LOC348840	IND
LOC57228	IND
LOH3CR2A	REP
LONRF1	IND
LPAR1	IND		REP
LPAR4	IND		IND
LPL	IND	IND	IND
LRRC19	IND
LRRC4	IND
LRRIQ1	IND
LRRN1	REP
LRRN4	REP
LSAMP	REP
LSM6	REP			IND
LUM	REP	REP
LYPD1	REP		IND
LYRM5	IND
MAB21L2	REP	REP	REP
MAEL	REP
MAFB	IND	IND	IND
MAGEA1	IND
MAL2	REP
MANBA	REP
MANSC1	IND		REP
MAP2K6	IND		IND	IND
MAP3K2	REP
MAP7D2	IND		IND
MAPK8IP1	REP
MAPT	IND	IND	IND	IND
MARCH3	REP
MARCH7	REP
MARK3	IND		IND
MASP1	REP
MC4R	REP
MCART1	IND
MCC	REP		REP
MCM9	REP
MCTP1	REP
MED12L	REP
MED4	IND
MEF2C	REP
MEGF10	REP
MGC2752	IND		IND
MGC4473	IND
MID1	REP		REP	REP
MIER1	REP
MKKS	IND		IND	IND
MME	REP	REP
MMP1	IND	IND	IND
MMP9	IND	IND	IND
MND1	IND
MOXD1	REP	REP	REP
MPHOSPH6	IND
MPZL2	IND
MRGPRF	REP	REP	REP
MRPL42	IND
MS4A4A	REP
MTCH2	IND
MTIF3	IND
MTMR6	IND
MUCL1	IND
MUM1L1	REP		IND
MYC	IND
MYCN	IND		IND
MYH10	IND
MYL7	REP
MYOCD	REP
MYOM2	IND	IND	IND
N4BP2L2	IND
NANOS1	IND		IND
NAPEPLD	REP
NCAPG	REP			IND
NCAPH	REP
NCOA7	REP
NDST1	REP
NDST3	IND
NEBL	REP		IND
NEFH	IND
NEK10	REP
NEK7	REP
NELL2	IND	IND	IND	IND
NEXN	REP		REP
NFASC	REP		REP
NFKB1	REP
NGLY1	REP
NIP30	IND
NKX2-2	IND	IND	IND	IND
NMNAT1	REP
NPR3	IND	IND	REP
NPY1R	IND	IND	IND
NPY5R	IND		IND
NR3C1	REP		REP
NRG4	IND
NRK	IND	IND	IND
NTNG1	IND	IND	IND
NTS	IND
NUDT11	IND	IND	IND
NUDT4	IND		IND
ODZ1	IND
OLFM1	IND		IND
OLFM2	IND		IND
OLFM3	IND	IND
OLFML2B	REP
OLFML3	IND	IND	IND
OLR1	REP
OPCML	IND		IND
OR10AD1	REP
OR2B3	IND
OR2W5	REP
OR5P3	REP
OR6N1	IND
OSBPL10	REP
OSBPL3	REP		REP
OSBPL6	REP		IND
OTX2	IND		IND
OXTR	REP		IND
PADI2	IND	IND	IND
PALLD	REP		REP	REP
PAPPA	IND		IND
PAQR5	IND	IND	IND
PARD3	IND		IND
PARD3B	REP		REP
PAX7	IND
PCDH11X	IND		IND
PCDH17	IND	IND	IND
PCDH18	REP		REP
PCDH7	REP	IND	IND
PCMTD2	IND
PCOLCE2	REP	REP	REP
PCSK2	IND	IND	IND	IND
PDE1C	REP		REP
PDE3A	REP
PDE5A	REP		REP
PDGFC	REP
PDGFD	IND		REP
PDGFRA	REP	REP	REP
PDGFRB	REP
PDGFRL	REP		REP
PDIA5	IND
PDS5B	IND
PEG10	REP		REP
PFTK1	IND	IND	IND	IND
PGM1	REP
PGM2L1	IND	IND	IND
PHF17	REP
PHF19	REP		REP
PHLDB2	REP
PHOSPHO1	IND
PI4K2A	IND		IND
PIK3C3	IND		IND
PIK3CG	IND
PITPNA	IND
PLA2G4A	REP
PLAC8	REP
PLAT	REP
PLCE1	REP
PLK2	REP		REP
PLN	REP
PLS1	REP
PLVAP	IND
PLXNA2	IND
PLXNA2	IND
PMS2CL	REP
POLK	REP
POSTN	REP		IND
POU4F1	IND		IND
PPAP2B	REP	REP	REP
PPARG	REP		REP
PPP1R1A	IND		IND	IND
PPP1R3C	REP	REP	REP
PPP2R5A	REP
PRDM1	REP		REP
PRDM14	IND
PREX1	IND	IND	IND
PRICKLE2	REP
PRKCB	IND
PRKCZ	REP
PRSS23	REP		REP	REP
PRSS35	IND	IND	IND
PSMD12	IND
PTGER3	IND	IND	IND	IND
PTGER4	REP	IND
PTGS2	REP	IND
PTHLH	REP		REP
PTPN13	IND	IND		IND
PTPN22	IND	IND	IND
PTPN5	IND		IND
PTPRD	REP		REP
PTPRG	IND
PTPRN	REP
PTTG1IP	IND
PTX3	REP			REP
PURG	IND		IND
PXK	REP
RAB27B	REP		REP
RAB3C	IND
RAB3IL1	IND
RAMP2	IND
RANBP17	REP
RANBP3L	REP
RARB	REP
RARRES2	IND	IND	IND
RASAL2	REP
RASGRP3	IND
RASSF2	IND		IND
RBKS	REP
RBM25	IND		IND
RBMS3	REP
RCN3	IND
RCOR1	IND		IND	IND
REEP3	IND
RELN	IND	IND	IND
RFESD	REP
RFTN1	REP
RGS2	REP	IND	IND
RHOH	IND		IND	IND
RIMS2	REP
RIPK2	REP
RNASE1	IND
RND3	REP			REP
RNF133	IND
RNF144B	REP
RNF148	IND		IND
RNF182	IND
ROPN1	REP
RORA	IND
RSPO3	REP
RUNX2	REP	REP
RYR2	IND
S100B	REP
S1PR1	IND
SCAMP2	IND
SCARA3	REP	REP	REP
SCLT1	REP
SCMH1	REP
SCNN1G	IND	IND	IND
SCP2	REP
SDC4	REP		REP
SDK1	IND		IND
SEMA3E	REP
SEMA5A	REP		REP
SEMA5B	IND
SEPT6	IND
SERPINE2	IND		REP	REP
SETBP1	REP
SFRP1	REP		REP
SGK1	IND		IND
SGMS2	REP
SGOL1	REP
SH2B3	IND	IND	IND	IND
SH2D1B	IND		IND
SH2D4A	REP
SH3RF2	REP
SIM2	IND
SLAIN1	IND	IND	IND
SLC17A7	IND	IND	IND
SLC1A1	IND		REP
SLC1A3	REP
SLC22A23	REP
SLC22A3	REP
SLC24A3	IND		IND	IND
SLC25A16	IND
SLC26A2	IND	IND	IND
SLC39A14	REP
SLC39A8	REP	IND
SLC40A1	REP		REP
SLC43A1	IND		IND
SLC4A4	REP		REP
SLC5A6	IND	IND	IND	IND
SLC7A2	REP
SLC7A8	IND
SLC8A1	REP		REP
SLC9A7	IND		IND
SLCO3A1	IND
SLCO5A1	IND	IND	IND
SLFN11	IND	IND	IND
SLFN12	IND	IND	IND
SMAD3	REP		REP
SMYD3	REP
SNAI2	REP			REP
SNAP25	IND		IND
SNF8	IND
SNRNP70	IND
SNRPB2	IND
SNX25	REP
SORBS2	IND
SORD	IND	IND	IND	IND
SOX6	IND	IND	IND
SP140	REP
SPOCK1	REP		REP
SPOPL	REP
SPSB1	REP
SPSB4	REP
SSBP2	REP
ST20	IND
ST3GAL6	REP		REP
ST6GALNAC3	REP
ST8SIA2	IND		IND
ST8SIA2	IND		IND
ST8SIA3	IND
ST8SIA5	IND		IND
STAC	REP
STAR	IND	IND	IND
STARD13	IND		IND
STARD8	IND		IND
STEAP2	IND	IND
STEAP3	IND		IND	IND
STGC3	REP
STK17B	REP		REP
STON1-GTF2A1L	REP
STRBP	IND		IND
STXBP5	REP
SYNE2	IND		IND	IND
SYNPR	IND	IND	IND
SYT1	IND		IND
SYT10	REP
SYT6	IND
SYTL5	REP
TAL1	IND
TCF4	IND	IND	IND
TCTEX1D1	IND		IND
TEX9	IND
TFAP2B	IND		IND
TGFBI	REP
TGM2	REP		REP
THAP2	IND
THYN1	IND			IND
TIAM2	REP
TIGD2	REP
TIMP1	IND
TINAGL1	REP
TLE1	REP		REP
TLR3	REP		IND
TLR6	REP
TMEFF2	IND	IND	IND
TMEM183A	REP
TMEM56	REP
TMEM71	IND
TMEM84	IND		IND
TNFAIP3	REP
TNFRSF21	REP
TNFSF4	REP		IND
TNIK	REP
TNS3	REP
TOX2	IND		IND
TRDN	IND	IND	IND
TRERF1	REP
TRHDE	IND	IND	IND	IND
TRIB2	IND	IND	IND
TRIM48	REP
TRIM55	REP
TSHZ3	IND
TSPAN11	IND		IND
TSPAN2	REP
TTC30B	IND
TTLL5	IND
TTTY12	IND
TTYH2	IND		IND
TUBA1A	IND
TUFT1	REP			REP
UBE2CBP	IND		IND
UGT3A2	IND
UNC13B	IND
UNC5C	REP
USP53	REP		REP
USP6NL	IND		IND
UTS2	IND	IND	IND	IND
VASH1	IND		IND
VEGFC	REP		REP
VGLL3	REP		REP
VRK1	IND			IND
VWA5A	IND
WBSCR17	IND		IND
WDFY2	IND	IND
WDR51B	IND	IND	IND
WDR67	REP			IND
WISP1	REP	REP
WWOX	IND		IND	IND
XRCC4	REP
YPEL1	IND
ZBTB16	IND	IND	IND
ZC3H13	IND	IND
ZCCHC12	IND	IND	IND
ZDHHC21	IND	IND	IND
ZFP42	REP
ZFYVE21	IND
ZNF131	REP
ZNF32	IND
ZNF711	IND	IND	IND
ZSCAN4	REP
ZYG11A	REP
