# Supplementary material for: Modeling Initiation of Ewing Sarcoma in Human Neural Crest Cells
Source: PLoS One. 2011 Apr 29;6(4):e19305. doi: 10.1371/journal.pone.0019305 (PMC3084816; doi:10.1371/journal.pone.0019305)
Supplement: Table S3 — A. Transcripts specific to NCSC gene signature and significantly altered by EWS-FLI1 in NC-MSC. B. Over-represented gene ontologies among NCSC-specific genes that were also significantly altered by EWS-FLI1 in NC-MSC. (XLSX) [file pone.0019305.s003.xlsx]

## Sheet: Table S3A
ID	Gene Symbol	RefSeq	EF induced or repressed?	Up or Down in hNCSC?
2705748	AADACL1	NM_020792	REP	DOWN
2796553	ACSL1	NM_001995	REP	DOWN
3299504	ACTA2	NM_001613	IND	DOWN
3428088	ACTR6	NM_022496	IND	UP
2339682	ALG6	NM_013339	IND	UP
2324416	ALPL	NM_000478	IND	UP
2997376	ANLN	NM_018685	REP	UP
2677723	ARHGEF3	NM_001128615	REP	DOWN
3382216	ARRB1	NM_004041	IND	DOWN
2782694	ARSJ	NM_024590	REP	DOWN
3261923	AS3MT	NM_020682	IND	UP
2449559	ASPM	NM_018136	REP	UP
2726072	ATP10D	NM_020453	REP	DOWN
3863342	ATP1A3	NM_152296	IND	UP
3982423	ATP7A	NM_000052	IND	DOWN
3708223	BCL6B	NM_181844	IND	UP
3550307	BDKRB1	NM_000710	REP	DOWN
3550278	BDKRB2	NM_000623	REP	DOWN
3995633	BGN	NM_001711	IND	DOWN
2608725	BHLHE40	NM_003670	REP	DOWN
2958172	BMP5	NM_021073	REP	UP
2636319	BOC	NM_033254	REP	UP
3765580	BRIP1	NM_032043	REP	UP
2899372	BTN3A1	NM_007048	REP	DOWN
2570616	BUB1	NM_004336	REP	UP
3327166	C11orf74	AK302634	IND	UP
3428845	C12orf48	AK302724	IND	UP
2460325	C1orf198	NM_001136494	REP	DOWN
3848039	C3	NM_000064	REP	DOWN
2786567	C4orf49	NM_032623	REP	DOWN
3781531	CABLES1	NM_001100619	IND	DOWN
2340078	CACHD1	NM_020925	IND	UP
2522728	CASP8	NM_001228	REP	DOWN
3023103	CCDC136	NM_022742	REP	UP
2688813	CCDC80	NM_199511	REP	DOWN
2784113	CCNA2	NM_001237	REP	UP
3555300	CCNB1IP1	NM_021178	IND	UP
3338192	CCND1	NM_053056	IND	DOWN
4035833	CD24	NM_013230	IND	UP
2333136	CDC20	NM_001255	REP	UP
2459042	CDC42BPA	NM_003607	IND	DOWN
2548617	CDC42EP3	NM_006449	REP	DOWN
3090697	CDCA2	NM_152562	REP	UP
3040897	CDCA7L	NM_001127370	REP	UP
3061319	CDK6	NM_001259	REP	DOWN
3536336	CDKN3	NM_005192	REP	UP
3863669	CEACAM1	NM_001712	IND	DOWN
2697490	CEP70	NM_024491	REP	UP
3199500	CER1	NM_005454	IND	UP
3166844	CHMP5	NM_016410	IND	DOWN
2344984	CLCA2	NM_006536	IND	DOWN
2710599	CLDN1	NM_021101	IND	DOWN
7385641	CLSTN2	NM_022131	REP	DOWN
2958232	COL21A1	NM_030820	IND	UP
3238466	COMMD3	NM_012071	IND	DOWN
3023883	CPA4	NM_016352	REP	DOWN
2750627	CPE	NM_001873	REP	DOWN
2719361	CPEB2	NM_182485	IND	DOWN
2438458	CRABP2	NM_001878	REP	UP
3069470	CTTNBP2	NM_033427	IND	UP
2773434	CXCL2	NM_002089	REP	DOWN
2731350	CXCL6	NM_002993	REP	DOWN
2548699	CYP1B1	NM_000104	REP	DOWN
2922972	DCBLD1	NM_173674	REP	DOWN
4018218	DCX	NM_000555	IND	UP
2417528	DEPDC1	NM_001114120	REP	UP
3573870	DIO2	NM_013989	REP	DOWN
3552684	DIO3	NM_001362	IND	UP
2731636	DKFZP564O0823	NM_015393	REP	DOWN
2424524	DPYD	NM_000110	REP	DOWN
2457261	DUSP10	NM_007207	REP	DOWN
2746591	EDNRA	NM_001957	IND	UP
2554018	EFEMP1	NM_004105	REP	DOWN
3148582	EIF3E	NM_001568	IND	UP
2941721	ELOVL2	NM_017770	REP	DOWN
2419432	ELTD1	NM_022159	IND	DOWN
3679959	EMP2	NM_001424	IND	UP
3226097	ENG	NM_000118	IND	DOWN
2327677	EPB41	NM_203342	IND	UP
2821347	ERAP2	NM_022350	REP	DOWN
2395177	ERRFI1	NM_018948	REP	DOWN
3078348	EZH2	NM_004456	IND	UP
2863363	F2RL2	NM_004101	IND	DOWN
3333247	FADS2	NM_004265	IND	DOWN
3375582	FADS3	NM_021727	IND	DOWN
2537171	FAM150B	NM_001002919	REP	DOWN
2658785	FAM43A	NM_153690	IND	DOWN
3257098	FAS	NM_000043	IND	DOWN
3151607	FBXO32	NM_058229	IND	DOWN
3381377	FCHSD2	NM_014824	IND	DOWN
3523499	FGF14	NM_175929	IND	UP
3310041	FGFR2	NM_000141	IND	UP
2568687	FHL2	NM_201555	REP	DOWN
3546924	FLRT2	NM_013231	IND	DOWN
2732655	FRAS1	NM_025074	REP	UP
3199511	FREM1	NM_144966	IND	UP
2401643	FUCA1	NM_000147	IND	DOWN
2977510	FUCA2	NM_032020	REP	DOWN
2836518	GALNT10	NM_198321	REP	DOWN
2511603	GALNT5	NM_014568	REP	DOWN
2421883	GBP1	NM_002053	REP	DOWN
2421843	GBP3	NM_018284	REP	DOWN
2421925	GBP7	NM_207398	REP	DOWN
3824993	GDF15	NM_004864	IND	DOWN
2853885	GDNF	NM_000514	REP	DOWN
2343334	GIPC2	NM_017655	IND	UP
3197140	GLIS3	NM_001042413	REP	DOWN
3210737	GNA14	NM_004297	IND	DOWN
3239437	GPR158	NM_020752	REP	DOWN
4001654	GPR64	NM_001079858	IND	UP
2819779	GPR98	NM_032119	REP	UP
3267036	GRK5	NM_005308	IND	DOWN
3970024	GRPR	NM_005314	REP	UP
2748830	GUCY1A3	NM_000856	REP	UP
2519480	GULP1	NM_016315	REP	UP
2692909	HEG1	NM_020733	REP	DOWN
2946232	HIST1H1C	NM_005319	REP	UP
2899768	HIST1H4I	NM_003495	REP	UP
2604254	HJURP	NM_018410	REP	UP
2507896	HNMT	NM_006895	REP	DOWN
2338625	HOOK1	NM_015888	IND	UP
3434012	HSPB8	NM_014365	IND	DOWN
3820443	ICAM1	NM_000201	IND	DOWN
2468622	ID2	NM_002166	IND	UP
4025339	IDS	NM_000202	IND	DOWN
3721010	IGFBP4	NM_001552	IND	DOWN
3988538	IL13RA1	NM_001560	IND	DOWN
3391255	IL18	NM_001562	REP	DOWN
2571483	IL1A	NM_000575	IND	DOWN
2657831	IL1RAP	NM_002182	IND	DOWN
2857416	IL6ST	NM_002184	REP	DOWN
2731332	IL8	NM_000584	REP	DOWN
3848243	INSR	NM_000208	IND	UP
3497790	IPO5	NM_002271	IND	UP
3692280	IRX3	NM_024336	IND	UP
2809245	ITGA2	NM_002203	REP	DOWN
2416522	JAK1	NM_002227	IND	DOWN
2896177	JARID2	NM_004973	IND	UP
3544562	JDP2	NM_001135049	REP	DOWN
3930212	KCNE1	NM_000219	REP	DOWN
3296046	KCNMA1	NM_002247	REP	DOWN
3604147	KIAA1199	NM_018689	REP	DOWN
3161167	KIAA1432	NM_020829	IND	DOWN
3367338	KIF18A	NM_031217	REP	UP
4019160	KLHL13	NM_033495	IND	UP
2508520	KYNU	NM_003937	REP	DOWN
2762088	LDB2	NM_001130834	IND	UP
3510450	LHFP	NM_005780	IND	DOWN
2326485	LIN28	NM_024674	REP	UP
2609347	LMCD1	NM_014583	REP	DOWN
3446137	LMO3	NM_018640	IND	UP
2522094	LOC26010	NM_001100422	REP	DOWN
3125001	LONRF1	NM_152271	IND	UP
3982534	LPAR4	NM_005296	IND	UP
3071459	LRRC4	NM_022143	IND	UP
3424705	LRRIQ1	NM_001079910	IND	UP
3896594	LRRN4	NM_152611	REP	DOWN
2746269	LSM6	NM_007080	REP	UP
2576988	LYPD1	NM_144586	REP	DOWN
2747314	MAB21L2	NM_006439	REP	UP
3733065	MAP2K6	NM_002758	IND	UP
2873897	MARCH3	NM_178450	REP	DOWN
2709631	MASP1	NM_001879	REP	DOWN
3205633	MCART1	NM_033412	IND	DOWN
2867443	MCTP1	NM_024717	REP	DOWN
2647898	MED12L	NM_053002	REP	UP
3887210	MMP9	NM_004994	IND	DOWN
2748163	MND1	NM_032117	IND	UP
3701837	MPHOSPH6	NM_005792	IND	UP
3393720	MPZL2	NM_144765	IND	UP
3379777	MRGPRF	NM_001098515	REP	DOWN
3426215	MRPL42	NM_014050	IND	UP
3115504	MYC	NM_002467	IND	DOWN
2470838	MYCN	NM_005378	IND	UP
3710823	MYOCD	NM_153604	REP	DOWN
3065480	NAPEPLD	NM_001122838	REP	UP
2720251	NCAPG	NM_022346	REP	UP
2494484	NCAPH	NM_015341	REP	UP
2924514	NCOA7	NM_181782	REP	DOWN
2835531	NDST1	NM_001543	REP	DOWN
2740896	NDST3	NM_004784	IND	UP
3280573	NEBL	NM_006393	REP	UP
2373736	NEK7	NM_133494	REP	DOWN
3451814	NELL2	NM_006159	IND	UP
2343231	NEXN	NM_144573	REP	DOWN
2737717	NFKB1	NM_003998	REP	DOWN
2319518	NMNAT1	NM_022787	REP	DOWN
2805635	NPR3	NM_000908	IND	UP
2792127	NPY1R	NM_000909	IND	UP
2879312	NR3C1	NM_000176	REP	DOWN
3986087	NRK	NM_198465	IND	DOWN
2349863	NTNG1	NM_001113226	IND	DOWN
3424898	NTS	NM_006183	IND	UP
3193725	OLFM1	NM_014279	IND	UP
2425652	OLFM3	NM_058170	IND	UP
3444043	OLR1	NM_002543	REP	DOWN
2667809	OSBPL10	NM_017784	REP	DOWN
3041875	OSBPL3	NM_015550	REP	DOWN
3566176	OTX2	NM_021728	IND	UP
2661992	OXTR	NM_000916	REP	DOWN
2751066	PALLD	NM_016081	REP	DOWN
3186491	PAPPA	NM_002581	IND	DOWN
2524016	PARD3B	NM_152526	REP	DOWN
2323347	PAX7	NM_001135254	IND	UP
4047493	PCDH18	NM_019035	REP	UP
2722823	PCDH7	NM_032456	REP	DOWN
3894047	PCMTD2	NM_018257	IND	UP
3044597	PDE1C	NM_005020	REP	DOWN
3407453	PDE3A	NM_000921	REP	UP
2783596	PDE5A	NM_001083	REP	UP
2791197	PDGFC	NM_016205	REP	DOWN
2881239	PDGFRB	NM_002609	REP	DOWN
2639225	PDIA5	NM_006810	IND	DOWN
3484768	PDS5B	NM_015032	IND	UP
3223687	PHF19	NM_015651	REP	DOWN
3259978	PI4K2A	NM_018425	IND	DOWN
2775909	PLAC8	NM_016619	REP	DOWN
3133233	PLAT	NM_000930	REP	DOWN
2858023	PLK2	NM_006622	REP	DOWN
2923270	PLN	NM_002667	REP	DOWN
3456840	PPP1R1A	NM_006741	IND	UP
2919669	PRDM1	NM_001198	REP	DOWN
3139690	PRDM14	NM_024504	IND	UP
2679917	PRICKLE2	NM_198859	REP	DOWN
3653123	PRKCB	NM_002738	IND	UP
3343452	PRSS23	NM_007173	REP	DOWN
2807621	PTGER4	NM_000958	REP	DOWN
2448382	PTGS2	NM_000963	REP	DOWN
3448744	PTHLH	NM_198965	REP	DOWN
2734629	PTPN13	NM_080683	IND	UP
3365601	PTPN5	NM_006906	IND	UP
3198346	PTPRD	NM_002839	REP	UP
2600089	PTPRN	NM_002846	REP	DOWN
3934695	PTTG1IP	NM_004339	IND	DOWN
2649367	PTX3	NM_002852	REP	DOWN
2810805	RAB3C	NM_138453	IND	UP
2853426	RANBP3L	NM_145000	REP	DOWN
2614369	RARB	NM_000965	REP	UP
2369110	RASAL2	NM_170692	REP	DOWN
2615060	RBMS3	NM_001003793	REP	DOWN
3838665	RCN3	NM_020650	IND	DOWN
3249043	REEP3	BC018658	IND	DOWN
2664640	RFTN1	NM_015150	REP	DOWN
2372858	RGS2	NM_002923	REP	UP
2580802	RND3	NM_005168	REP	DOWN
2897172	RNF144B	NM_182757	REP	DOWN
2908762	RUNX2	NM_001024630	REP	DOWN
2349129	S1PR1	NM_001400	IND	DOWN
2336585	SCP2	NM_002979	REP	DOWN
3907234	SDC4	NM_002999	REP	DOWN
2847967	SEMA5A	NM_003966	REP	DOWN
2692199	SEMA5B	NM_001031702	IND	UP
2975014	SGK1	NM_005627	IND	DOWN
2738664	SGMS2	NM_001136258	REP	DOWN
2665572	SGOL1	NM_001012410	REP	UP
3088213	SH2D4A	NM_022071	REP	DOWN
2730746	SLC4A4	NM_001098484	REP	DOWN
3557209	SLC7A8	NM_012244	IND	UP
2549565	SLC8A1	NM_021097	REP	DOWN
3753538	SLFN12	NM_018042	IND	DOWN
3598959	SMAD3	NM_005902	REP	DOWN
3876245	SNAP25	NM_003081	IND	DOWN
2797202	SORBS2	AF090937	IND	DOWN
2531233	SP140	NM_007237	REP	DOWN
2319252	SPSB1	NM_025106	REP	DOWN
2864849	SSBP2	NM_012446	REP	UP
2342738	ST6GALNAC3	NM_152996	REP	UP
3789680	ST8SIA3	NM_015879	IND	UP
2616804	STAC	NM_003149	REP	DOWN
3508898	STARD13	NM_178006	IND	DOWN
3011861	STEAP2	NM_152999	IND	UP
3224591	STRBP	NM_018387	IND	UP
2929870	STXBP5	NM_001127715	REP	DOWN
3539724	SYNE2	NM_182914	IND	UP
2627251	SYNPR	NM_001130003	IND	UP
2428932	SYT6	NM_205848	IND	UP
3973891	SYTL5	NM_138780	REP	DOWN
2909948	TFAP2B	NM_003221	IND	UP
2829947	TGFBI	NM_000358	REP	DOWN
3905145	TGM2	NM_004613	REP	DOWN
3976341	TIMP1	NM_003254	IND	DOWN
2328320	TINAGL1	NM_022164	REP	DOWN
2766262	TLR6	NM_006068	REP	DOWN
3154185	TMEM71	NM_144649	IND	DOWN
2956052	TNFRSF21	NM_014452	REP	DOWN
2444283	TNFSF4	NM_003326	REP	DOWN
2705266	TNIK	NM_015028	REP	DOWN
3049522	TNS3	NM_022748	REP	DOWN
2470165	TRIB2	NM_021643	IND	UP
3330551	TRIM48	NM_024114	REP	DOWN
3101514	TRIM55	NM_033058	REP	DOWN
3410056	TSPAN11	AY358804	IND	DOWN
2588965	TTC30B	NM_152517	IND	UP
2358993	TUFT1	NM_020127	REP	DOWN
2962683	UBE2CBP	NM_198920	IND	UP
2853325	UGT3A2	NM_174914	IND	UP
2741236	USP53	NM_019050	REP	DOWN
2794792	VEGFC	NM_005429	REP	DOWN
3550485	VRK1	NM_003384	IND	UP
3114064	WDR67	NM_145647	REP	UP
3116839	WISP1	NM_003882	REP	DOWN
3669650	WWOX	NM_016373	IND	UP
2818454	XRCC4	NM_022550	REP	UP
3954206	YPEL1	NM_013313	IND	UP
3349719	ZBTB16	NM_006006	IND	UP
3512769	ZC3H13	NM_015070	IND	UP
2755567	ZFP42	NM_174900	REP	UP
3983154	ZNF711	NM_021998	IND	UP

## Sheet: Table S3B
	# genes	p-Value	Fold Enrichment
Induced by EWS-FLI1 and up-regulated in hNCSC
BP00246:Ectoderm development	13	3.9e-05	4.2
BP00193:Developmental processes	22	0.000196	2.29
BP00199:Neurogenesis	11	0.000254	4.11
Repressed by EWS-FLI1 and down-regulated in hNCSC
BP00122:Ligand-mediated signaling	12	0.000241	3.87
BP00148:Immunity and defense	22	0.000512	2.25
BP00193:Developmental processes	29	0.00149	1.81
BP00201:Skeletal development	6	0.00275	6.18
BP00248:Mesoderm development	12	0.003	2.84
BP00274:Cell communication	19	0.00307	2.1
BP00155:Macrophage-mediated immunity	6	0.00413	5.62
Induced by EWS-FLI1 and down-regulated in hNCSC
BP00102:Signal transduction	22	0.000468086	2.02817
Repressed by EWS-FLI1 and up-regulated in hNCSC
BP00056:Metabolism of cyclic nucleotides	3	0.00543626	26.2665
