# Supplementary material for: Modeling Initiation of Ewing Sarcoma in Human Neural Crest Cells
Source: PLoS One. 2011 Apr 29;6(4):e19305. doi: 10.1371/journal.pone.0019305 (PMC3084816; doi:10.1371/journal.pone.0019305)
Supplement: Table S4 — RT-PCR primer sequences. (XLSX) [file pone.0019305.s004.xlsx]

## Sheet: Table S4
	Forward Primer	Reverse Primer
p75	agccaaccagaccgtgtgt	ttgcagctgttccacctctt
HNK-1	gcaagaagggcttcactgac	gcccccagaatagaaaggag
EWS-FLI-1	cgactagttatgatcagagcagt	ccgttgctctgtattcttactga
NKX 2.2	tgggagagggctgaactcta	ccgaatagctgagctccaag
ID2	cgtgaggtccgttaggaaaa	atagtgggatgcgagtccag
Nestin	gagggaagtcttggagccac	aagatgtccctcagcctgg
Vimentin	attccactttgcgttcaagg	cttcagagagaggaagccga
Gapdh	cttttaactctggtaaagtgg	ttttggctcccccctgcaaat
